# Supplementary material for: Dioxygenation of unprotected mesoionic N-heterocyclic olefins
Source: Royal Society of Chemistry journal article supplement (doi:10.1039/d1cc04695k), 2021-01-01
Supplement: d1cc04695k1.pdf [file d1cc04695k1.pdf]

Supporting Information

# Dioxygenation of unprotected mesoionic N-heterocyclic olefins

Qiuming Liang,<sup>a</sup> Kasumi Hayashi,<sup>a</sup> Longfei Li<sup>b</sup> and Datong Song<sup>\*a</sup>

<sup>a</sup> *Davenport Chemical Research Laboratories, Department of Chemistry, University of Toronto  
80 St. George Street, Toronto, Ontario, Canada, M5S 3H6*

E-mail: [d.song@utoronto.ca](mailto:d.song@utoronto.ca)

<sup>b</sup> *College of Pharmacy, Hebei University, Baoding 071002, Hebei, P. R. China*

|                               |     |
|-------------------------------|-----|
| 1. Experimental section.....  | S2  |
| 2. NMR spectra.....           | S11 |
| 3. IR spectra.....            | S23 |
| 4. HRMS.....                  | S24 |
| 5. X-ray crystallography..... | S26 |
| 6. Computation.....           | S31 |
| 7. References.....            | S37 |

## 1. Experimental section

All reactions were carried out in a dinitrogen-filled glovebox or using the standard Schlenk techniques under dinitrogen. Glassware was dried in a 180 °C oven overnight. Diethyl ether, hexanes and *n*-pentane solvent were dried by refluxing and distilling over sodium under dinitrogen. THF and toluene solvent were dried by refluxing and distilling over sodium benzophenone ketyl under dinitrogen. C<sub>6</sub>D<sub>6</sub>, toluene-*d*<sub>8</sub> and CDCl<sub>3</sub> were degassed through three consecutive freeze–pump–thaw cycles. All solvents were stored over 3 Å molecular sieves prior to use. Unless otherwise noted, all NMR spectra were recorded at 25 °C on an Agilent DD2 600 MHz spectrometer or an Agilent DD2 500 MHz spectrometer with <sup>13</sup>C-sensitive cryogenically cooled probe. Chemical shifts are referenced to the solvent signals. The NMR signal assignments were made based on <sup>1</sup>H-COSY, <sup>1</sup>H-<sup>13</sup>C-HSQC, and <sup>1</sup>H-<sup>13</sup>C-HMBC NMR spectroscopy. IR spectra were recorded on a Bruker ALPHA spectrometer equipped with a diamond ATR sampling unit. Elemental analyses were carried out at the ANALEST at the University of Toronto. High-resolution mass spectrograms were recorded at the AIMS Mass Spectrometry Laboratory at the University of Toronto. Unless otherwise noted, all chemicals were purchased from commercial sources and used as received.

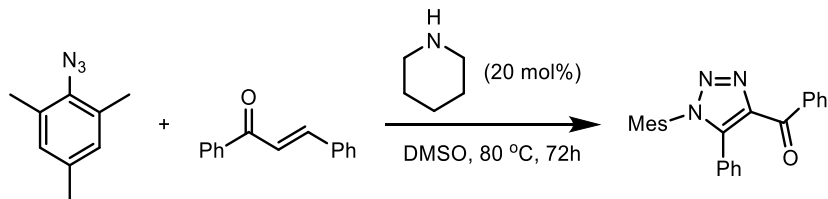

Benzalacetophenone<sup>1</sup> (10.4 g, 50 mmol), mesityl azide<sup>2</sup> (16.1 g, 100 mmol) and piperidine (1.0 mL, 10 mmol, 20 mol %) were dissolved in 50 mL of DMSO. The reaction mixture was stirred at 80 °C for 72 h. After cooling to room temperature, the mixture was partitioned with diethyl ether (100 mL) and water (100 mL). The aqueous layer was extracted with diethyl ether (2 × 100 mL). The combined ether fractions were washed with brine, dried over MgSO<sub>4</sub>, filtered, and concentrated to dryness under reduced pressure.

The residue was recrystallized from dichloromethane / hexanes to afford (1-mesityl-5-phenyl-1,2,3-triazol-4-yl)(phenyl)methanone as a white solid. Yield: 10.6 g, 58%.  $^1\text{H}$  NMR (500 MHz, 25 °C,  $\text{CDCl}_3$ )  $\delta$  8.34 – 8.28 (m, 2H, Ph-*H*), 7.65 – 7.57 (m, 1H, Ph-*H*), 7.54 – 7.47 (m, 2H, Ph-*H*), 7.37 – 7.32 (m, 1H, Ph-*H*), 7.33 – 7.24 (m, 4H, Ph-*H*), 6.94 – 6.90 (m, 2H, Mes-*H*), 2.31 (s, 3H, Mes-*CH*<sub>3</sub>), 1.95 (s, 6H, Mes-*CH*<sub>3</sub>).  $^{13}\text{C}$  NMR (126 MHz, 25 °C,  $\text{CDCl}_3$ )  $\delta$  187.13 (C=O), 142.93, 142.54, 140.48 (Mes-C), 137.50 (Ph-C), 135.42 (Mes-C), 133.21 (Ph-C), 131.85 (Mes-C), 130.89 (Ph-C), 129.97 (Ph-C), 129.51 (Ph-C), 129.42 (Mes-C), 128.43 (Ph-C), 128.40 (Ph-C), 125.92, 21.30 (Mes-*CH*<sub>3</sub>), 17.87 (Mes-*CH*<sub>3</sub>). HRMS (ESI):  $m/z$  calcd for  $\text{C}_{24}\text{H}_{21}\text{N}_3\text{ONa}$   $[\text{M}+\text{Na}]^+$  390.1577, found 390.1572.

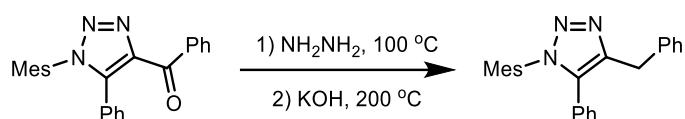

A mixture of (1-mesityl-5-phenyl-1,2,3-triazol-4-yl)(phenyl)methanone (7.4 g, 20 mmol), 85% hydrazine hydrate (10 ml) and diethylene glycol (100 ml) was heated at 100 °C for 1 h. To the reaction mixture was then added of KOH pellets (10 g) and the resulting mixture was heated to 200 °C for 4 h. After cooling to room temperature, the mixture was partitioned with diethyl ether (100 mL) and water (100 mL). The aqueous layer was extracted with diethyl ether (2 × 100 mL). The combined ether fractions were washed with brine, dried over  $\text{MgSO}_4$ , filtered and concentrated to dryness under reduced pressure. The residue was purified by flash chromatography eluted with ethyl acetate (0–10% gradient by volume) in hexanes. The product 4-benzyl-1-mesityl-5-phenyl-1,2,3-triazole was isolated as a colorless oil. Yield: 5.2 g, 74%.  $^1\text{H}$  NMR (500 MHz, 25 °C,  $\text{CDCl}_3$ )  $\delta$  7.32 – 7.21 (m, 7H, overlapping, Ph-*H*), 7.22 – 7.18 (m, 1H, Ph-*H*), 7.04 – 7.00 (m, 2H, Ph-*H*), 6.89 (s, 2H, Mes-*H*), 4.20 (s, 2H, *CH*<sub>2</sub>), 2.29 (s, 3H, Mes-*CH*<sub>3</sub>), 1.90 (s, 6H, Mes-*CH*<sub>3</sub>).  $^{13}\text{C}$  NMR (126 MHz, 25 °C,  $\text{CDCl}_3$ )  $\delta$  143.53 (triazole-C), 139.84 (Mes-C), 139.75, 135.80, 135.53 (Mes-C), 132.84 (Mes-C), 129.22 (Mes-C), 128.98, 128.76, 128.67, 128.66, 128.57, 127.17,

126.37 (Ph-C), 31.61 (CH<sub>2</sub>), 21.26 (Mes-CH<sub>3</sub>), 17.78 (Mes-CH<sub>3</sub>). HRMS (ESI): *m/z* calcd for C<sub>24</sub>H<sub>24</sub>N<sub>3</sub> [M+H]<sup>+</sup> 354.1965, found 354.1969.

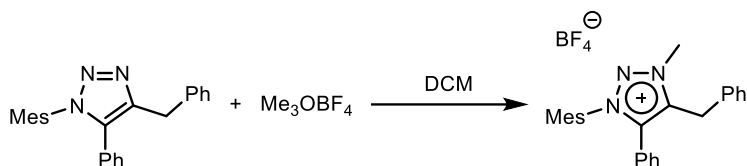

Trimethyloxonium tetrafluoroborate (1.1 g, 7.5 mmol, 1.3 equiv.) was added as solid to a stirring solution of 4-benzyl-1-mesityl-5-phenyl-1,2,3-triazole (2.1 g, 5.9 mmol) in DCM (20 mL). The mixture was stirred at room temperature overnight. It was then filtered, concentrated under vacuum to ~5 mL and dropwise added into rapid stirring diethyl ether (20 mL). The white precipitate was collected by filtration, washed with diethyl ether (3 × 5 mL) and *n*-pentane (3 × 5 mL), and dried under vacuum. Yield: 2.4 g, 89%. X-ray quality crystals were obtained by vapor diffusion of *n*-pentane into its concentrated DCM solution at room temperature. <sup>1</sup>H NMR (500 MHz, 25 °C, CDCl<sub>3</sub>) δ 7.49 – 7.42 (m, 1H, Ph-*H*), 7.41 – 7.34 (m, 2H, Ph-*H*), 7.36 – 7.24 (m, 5H, Ph-*H*), 7.08 – 7.03 (m, 2H, Ph-*H*), 6.96 (q, *J* = 0.8 Hz, 2H, Mes-*H*), 4.55 (s, 2H, CH<sub>2</sub>), 4.27 (s, 3H, N-CH<sub>3</sub>), 2.32 (s, 3H, Mes-CH<sub>3</sub>), 2.03 (s, 6H, Mes-CH<sub>3</sub>). <sup>13</sup>C NMR (126 MHz, 25 °C, CDCl<sub>3</sub>) δ 142.47 (Mes-C), 142.08 (Ph-C), 141.56 (triazolium-C), 135.21 (Mes-C), 134.02 (Ph-C), 131.68 (Ph-C), 129.96, 129.92 (Mes-C), 129.64, 129.64, 129.41 (Ph-C), 128.27 (Ph-C), 128.00 (Ph-C), 122.39, 39.08 (N-CH<sub>3</sub>), 29.08 (CH<sub>2</sub>), 21.33 (Mes-CH<sub>3</sub>), 17.59 (Mes-CH<sub>3</sub>). HRMS (ESI): *m/z* calcd for C<sub>25</sub>H<sub>26</sub>N<sub>3</sub> [M-BF<sub>4</sub>]<sup>+</sup> 368.2121, found 368.2121.

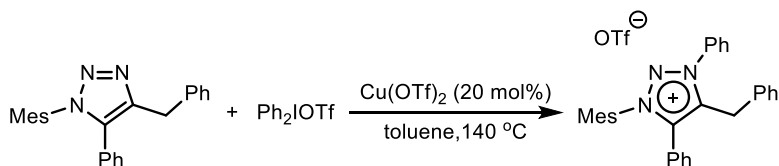

4-benzyl-1-mesityl-5-phenyl-1,2,3-triazole (1.8 g, 5.1 mmol), diphenyliodonium triflate<sup>3</sup> 430.179 (3.3 g, 7.7 mmol, 1.5 equiv.), Cu(OTf)<sub>2</sub> (368.9 mg, 1.02 mmol) and toluene (20 mL) were mixed in a Schlenk tube. The tube was sealed and the mixture was stirred at 140 °C overnight. All volatiles were removed under vacuum. The residue was purified by chromatography eluted with dichloromethane to afford a pale brown sticky foam. Yield: 1.9 g, 64%. <sup>1</sup>H NMR (500 MHz, 25 °C, CDCl<sub>3</sub>) δ 7.77 (dd, *J* = 7.2, 1.6 Hz, 2H, Ph-*H*), 7.65 – 7.58 (m, 1H, Ph-*H*), 7.57 – 7.54 (m, 2H, Ph-*H*), 7.49 – 7.41 (m, 3H, Ph-*H*), 7.41 – 7.35 (m, 2H, Ph-*H*), 7.12 – 7.05 (m, 3H, Ph-*H*), 6.96 (s, 2H, Mes-*H*), 6.67 (dd, *J* = 7.2, 2.2 Hz, 2H, Ph-*H*), 4.50 (s, 2H, CH<sub>2</sub>), 2.31 (s, 3H, Mes-CH<sub>3</sub>), 2.11 (s, 6H, Mes-CH<sub>3</sub>). <sup>13</sup>C NMR (126 MHz, 25 °C, CDCl<sub>3</sub>) δ 143.01, 142.60 (Mes-*C*), 142.05, 135.03 (Mes-*C*), 134.30, 133.87, 132.33 (Ph-*C*), 131.69 (Ph-*C*), 130.16 (Ph-*C*), 129.95 (Mes-*C*), 129.88 (Mes-*C*), 129.61 (Ph-*C*), 129.57 (Ph-*C*), 129.02 (Ph-*C*), 128.21 (Ph-*C*), 127.52 (Ph-*C*), 126.35 (Ph-*C*), 124.79, 120.97 (q, *J* = 320.7 Hz, CF<sub>3</sub>SO<sub>3</sub><sup>-</sup>), 29.95 (CH<sub>2</sub>), 21.28 (Mes-CH<sub>3</sub>), 17.70 (Mes-CH<sub>3</sub>). HRMS (ESI): *m/z* calcd for C<sub>30</sub>H<sub>28</sub>N<sub>3</sub> [M-OTf]<sup>+</sup> 430.2278, found 430.2280.

### Syntheses of mNHOs:

mNHO **1a**<sup>4</sup>, **1b**<sup>5</sup> and **1c**<sup>5</sup> were synthesized according to literatures.

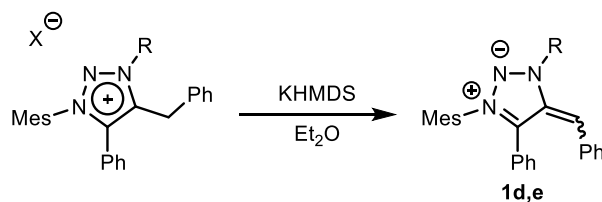

To a mixture of triazolium salt (2 mmol) and KHMDS (399.0 mg, 2 mmol) was added diethyl ether (10 mL). The reaction mixture instantaneously turned dark color. The reaction mixture was stirred for 1 h at room temperature and then filtered through Celite. All volatiles were removed under reduced pressure to afford a crystalline solid of **1d,e**. The solid was washed with *n*-pentane (3 × 5 mL) and dried under vacuum.

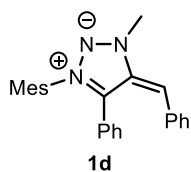

Dark green crystalline solid. Yield: 550.3 mg, 75%. Crystals suitable for X-ray crystallography were obtained by cooling a concentrated diethyl ether solution to  $-35\text{ }^{\circ}\text{C}$ .

$^1\text{H}$  NMR (500 MHz,  $25\text{ }^{\circ}\text{C}$ ,  $\text{C}_6\text{D}_6$ )  $\delta$  7.15 – 7.08 (m, 2H, Ph-*H*), 7.02 (dt,  $J = 6.1, 1.4$  Hz, 2H, Ph-*H*), 6.92 (dd,  $J = 8.3, 1.3$  Hz, 2H, Ph-*H*), 6.88 – 6.83 (m, 2H, Ph-*H*), 6.83 – 6.74 (m, 2H, Ph-*H*), 6.45 (s, 2H, Mes-*H*), 4.67 (s, 1H, CH), 3.12 (s, 3H, N- $\text{CH}_3$ ), 1.90 (s, 3H, Mes- $\text{CH}_3$ ), 1.84 (s, 6H, Mes- $\text{CH}_3$ ).  $^{13}\text{C}$  NMR (126 MHz,  $25\text{ }^{\circ}\text{C}$ ,  $\text{C}_6\text{D}_6$ )  $\delta$  141.00 (Ph-C), 140.63 (triazole-C), 140.27 (Mes-C), 135.42 (Mes-C), 133.21 (Mes-C), 129.41 (Mes-C), 127.85 (Ph-C), 127.77 (Ph-C), 127.66 (Ph-C), 127.29 (Ph-C), 126.89 (Ph-C), 123.97 (Ph-C), 121.11 (triazole-C), 117.80 (Ph-C), 66.11 (CH), 34.39 (N- $\text{CH}_3$ ), 20.94 (Mes- $\text{CH}_3$ ), 17.11 (Mes- $\text{CH}_3$ ). Anal. Calcd for  $\text{C}_{25}\text{H}_{25}\text{N}_3$ : C, 81.71; H, 6.86; N, 11.43. Found: C, 81.44; H, 7.23; N, 11.53.

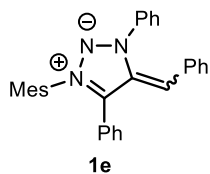

Dark green crystalline solid. Yield: 608.8 mg, 71%. Crystals suitable for X-ray crystallography were obtained by cooling a concentrated diethyl ether solution to  $-35\text{ }^{\circ}\text{C}$ .

$^1\text{H}$  NMR (500 MHz,  $25\text{ }^{\circ}\text{C}$ ,  $\text{C}_6\text{D}_6$ )  $\delta$  7.80 (s, 2H, Ph-*H*), 7.11 – 6.99 (m, 5H, Ph-*H*), 6.96 – 6.80 (m, 7H, Ph-*H*), 6.76 (t,  $J = 7.2$  Hz, 1H, Ph-*H*), 6.45 (s, 2H, Mes-*H*), 5.68 (s, 1H, CH), 1.95 (s, 6H, Mes- $\text{CH}_3$ ), 1.88 (s, 3H, Mes- $\text{CH}_3$ ).  $^{13}\text{C}$  NMR (126 MHz,  $25\text{ }^{\circ}\text{C}$ ,  $\text{C}_6\text{D}_6$ )  $\delta$  140.22 (Mes-C), 140.04 (Ph-C), 138.81, 135.24 (Mes-C), 133.01 (Mes-C), 129.40 (Mes-C), 127.54 (Ph-C), 124.74 (Ph-C), 20.93 (Mes- $\text{CH}_3$ ), 17.28 (Mes- $\text{CH}_3$ ). Although the X-ray structure shows the *Z* isomer, the toluene solution of compound **1e** contains a dynamic mixture of *E* and *Z* isomers. The ratio of two isomers is  $\sim 1:1.1$  at  $10\text{ }^{\circ}\text{C}$  and has negligible change by cooling to  $-35\text{ }^{\circ}\text{C}$ ; at  $25\text{ }^{\circ}\text{C}$  the signals of the two isomers coalesce into one broad set (see Figure S23). Anal. Calcd for  $\text{C}_{30}\text{H}_{27}\text{N}_3$ : C, 83.88; H, 6.34; N, 9.78. Found: C, 83.24; H, 6.55; N, 9.58.

## Reaction of mNHOs with O<sub>2</sub>:

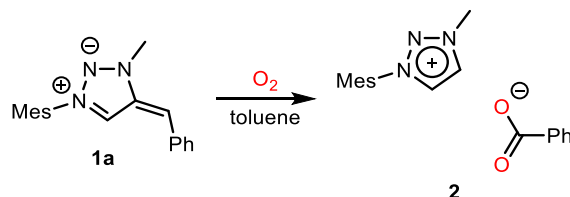

A solution of **1a**<sup>4</sup> (145.7 mg, 0.50 mmol) in 5 mL of toluene under nitrogen was subjected to a freeze–pump–thaw cycle before 1 atm of O<sub>2</sub> was introduced into the flask. The mixture was kept under O<sub>2</sub> for 15 min at room temperature. Top-layering the mixture with 5 mL of *n*-pentane and cooling to –35 °C afforded crystals of **2** that are suitable for X-ray crystallography. The supernatant was decanted off and the crystals were washed with *n*-pentane (3 × 5 mL) and dried under vacuum (134.5 mg, 83%). <sup>1</sup>H NMR (600 MHz, 25 °C, CDCl<sub>3</sub>): δ 11.47 and 11.46 (s and d, *J* = 1.4 Hz, 1H, triazolium-*H*), 9.30 and 9.28 (s and d, *J* = 1.4 Hz, 1H, triazolium-*H*), 7.97 – 7.93 (m, 2H, Ph-*H*), 7.30 – 7.19 (m, 3H, Ph-*H*), 6.94 (s, 2H, Mes-*H*), 4.69 (s, 3H, N-CH<sub>3</sub>), 2.31 (s, 3H, Mes-CH<sub>3</sub>), 1.93 (s, 6H, Mes-CH<sub>3</sub>). <sup>13</sup>C NMR (151 MHz, 25 °C, CDCl<sub>3</sub>) δ 172.70 (Ph-CO<sub>2</sub><sup>–</sup>), 142.43 (Mes-C), 139.86 (Ph-C), 135.87 (triazolium-C), 134.21 (Mes-C), 133.53 (triazolium-C), 131.41 (Mes-C), 129.90 (Mes-C), 129.27 (Ph-C), 128.99 (Ph-C), 127.32 (Ph-C), 40.63 (N-CH<sub>3</sub>), 21.28 (Mes-CH<sub>3</sub>), 17.27 (Mes-CH<sub>3</sub>). IR (neat solid) for **2**-<sup>16</sup>O<sub>2</sub>: ν (C<sup>16</sup>O<sub>2</sub><sup>–</sup>) 1558 and 1357 cm<sup>–1</sup>. IR (neat solid) for **2**-<sup>18</sup>O<sub>2</sub>: ν (C<sup>18</sup>O<sub>2</sub><sup>–</sup>) 1592 and 1338 cm<sup>–1</sup>. HRMS (ESI) for **2**-<sup>16</sup>O<sub>2</sub>: *m/z* calcd for C<sub>7</sub>H<sub>5</sub><sup>16</sup>O<sub>2</sub> [M–C<sub>12</sub>H<sub>16</sub>N<sub>3</sub>]<sup>–</sup> 121.0295, found 121.0295. HRMS (ESI) for **2**-<sup>18</sup>O<sub>2</sub>: *m/z* calcd for C<sub>7</sub>H<sub>5</sub><sup>18</sup>O<sub>2</sub> [M–C<sub>12</sub>H<sub>16</sub>N<sub>3</sub>]<sup>–</sup> 125.0380, found 125.0381. Anal. Calcd for C<sub>19</sub>H<sub>21</sub>N<sub>3</sub>O<sub>2</sub>: C, 70.57; H, 6.55; N, 12.99. Found: C, 70.35; H, 6.45; N, 12.95.

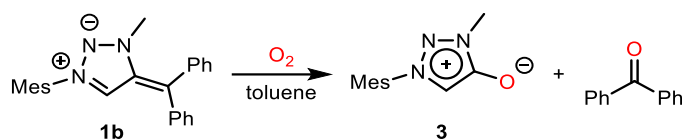

A solution of **1b**<sup>5</sup> (183.8 mg, 0.50 mmol) in 5 mL of toluene under nitrogen was subjected to a freeze–pump–thaw cycle before 1 atm of O<sub>2</sub> was introduced into the flask. The mixture was stirred for 15 min at room temperature. All volatiles were removed under vacuum. The residue was purified by flash chromatography eluted with dichloromethane. Compound **3** was isolated as a white solid. Yield: 95.4 mg, 82%. Crystals suitable for X-ray crystallography were obtained by slow evaporation of an acetone solution to at room temperature. <sup>1</sup>H NMR (500 MHz, 25 °C, CDCl<sub>3</sub>) δ 6.97 (q, *J* = 0.7 Hz, 2H, Mes-*H*), 6.62 (s, 1H, triazole-*H*), 3.78 (s, 3H, N-CH<sub>3</sub>), 2.33 (s, 3H, Mes-CH<sub>3</sub>), 2.06 (s, 6H, Mes-CH<sub>3</sub>). <sup>13</sup>C NMR (126 MHz, 25 °C, CDCl<sub>3</sub>) δ 158.60 (triazole-*C*), 140.96 (Mes-*C*), 134.60 (Mes-*C*), 133.65 (Mes-*C*), 129.38 (Mes-*C*), 108.55 (triazole-*C*), 31.39 (N-CH<sub>3</sub>), 21.24 (Mes-CH<sub>3</sub>), 16.91 (Mes-CH<sub>3</sub>). Anal. Calcd for C<sub>12</sub>H<sub>15</sub>N<sub>3</sub>O<sub>2</sub>: C, 66.34; H, 6.96; N, 19.34. Found: C, 66.70; H, 6.95; N, 18.87.

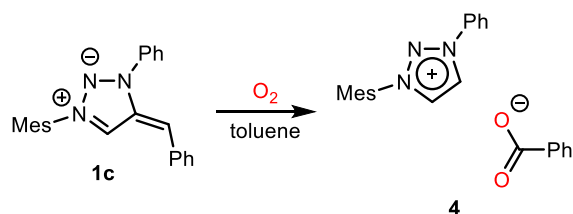

A solution of **1c**<sup>5</sup> (176.7 mg, 0.50 mmol) in 5 mL of toluene under nitrogen was subjected to a freeze–pump–thaw cycle before 1 atm of O<sub>2</sub> was introduced into the flask. The mixture was kept under O<sub>2</sub> for 15 min at room temperature. Top-layering the mixture with 5 mL of *n*-pentane and cooling to –35 °C afforded crystals of **4** that are suitable for X-ray crystallography. The supernatant was decanted off and the crystals were washed with *n*-pentane (3 × 5 mL) and dried under vacuum (171.2 mg, 89%). <sup>1</sup>H NMR (500 MHz, 25 °C, CDCl<sub>3</sub>) δ 11.68 and 11.67 (s and d, *J* = 1.6 Hz, 1H, triazolium-*H*), 9.51 and 9.49 (s and d, *J* = 1.5 Hz, 1H, triazolium-*H*), 8.27 – 8.22 (m, 2H, Ph-*H*), 8.06 – 8.02 (m, 2H, Ph-*H*), 7.59 – 7.55



(m, 3H, Ph-*H*), 7.30 – 7.24 (m, 3H, Ph-*H*), 7.01 (s, 2H, Mes-*H*), 2.35 (s, 3H, Mes-*CH*<sub>3</sub>), 2.05 (s, 6H, Mes-*CH*<sub>3</sub>). <sup>13</sup>C NMR (126 MHz, 25 °C, CDCl<sub>3</sub>) δ 172.93 (Ph-CO<sub>2</sub><sup>-</sup>), 142.70 and 142.69 (Mes-*C*), 139.81 (Ph-*C*), 135.68 and 135.61 (triazolium-*C*), 135.12 and 135.08 (Ph-*C*), 134.27 (Mes-*C*), 133.02 and 132.94 (triazolium-*C*), 132.04 (Ph-*C*), 131.49 and 131.46 (Mes-*C*), 130.65 (Ph-*C*), 130.03 (Mes-*C*), 129.45 (Ph-*C*), 129.07 (Ph-*C*), 127.35 (Ph-*C*), 121.28 (Ph-*C*), 21.33 (Mes-*CH*<sub>3</sub>), 17.44 (Mes-*CH*<sub>3</sub>). Anal. Calcd for C<sub>24</sub>H<sub>23</sub>N<sub>3</sub>O<sub>2</sub>: C, 74.78; H, 6.01; N, 10.90. Found: C, 75.01; H, 6.05; N, 10.72.

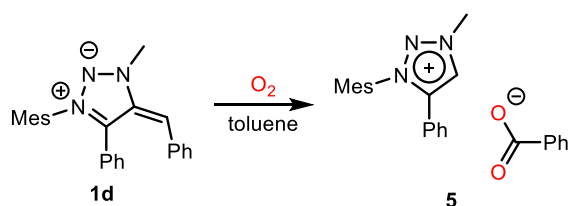

A solution of **1d** (183.8 mg, 0.50 mmol) in 5 mL of toluene under nitrogen was subjected to a freeze–pump–thaw cycle before 1 atm of O<sub>2</sub> was introduced into the flask. The mixture was kept under O<sub>2</sub> for 15 min at room temperature. Top-layering the mixture with 5 mL of *n*-pentane and cooling to –35 °C afforded crystals of **5** that are suitable for X-ray crystallography. The supernatant was decanted off and the crystals were washed with *n*-pentane (3 × 5 mL) and dried under vacuum (152.7 mg, 76%). <sup>1</sup>H NMR (600 MHz, 25 °C, CDCl<sub>3</sub>) δ 11.86 (s, 1H, triazolium-*H*), 8.19 – 8.15 (m, 2H), 7.44 – 7.38 (m, 1H), 7.40 – 7.35 (m, 2H), 7.36 – 7.30 (m, 5H), 7.06 (s, 2H), 4.79 (s, 3H, N-*CH*<sub>3</sub>), 2.39 (s, 3H, Mes-*CH*<sub>3</sub>), 1.90 (s, 6H, Mes-*CH*<sub>3</sub>). <sup>13</sup>C NMR (151 MHz, 25 °C, CDCl<sub>3</sub>) δ 173.14 (Ph-CO<sub>2</sub><sup>-</sup>), 143.59 (triazolium-*C*), 142.91 (Mes-*C*), 140.13 (Ph-*C*), 134.71 (Mes-*C*), 133.41 (triazolium-*C*), 131.80 (Ph-*C*), 130.67 (Mes-*C*), 130.34 (Mes-*C*), 129.79 (Ph-*C*), 129.52 (Ph-*C*), 129.12 (Ph-*C*), 127.70 (Ph-*C*), 127.47 (Ph-*C*), 122.57 (Ph-*C*), 41.01 (N-*CH*<sub>3</sub>), 21.42 (Mes-*CH*<sub>3</sub>), 17.48 (Mes-*CH*<sub>3</sub>). Anal. Calcd for C<sub>25</sub>H<sub>25</sub>N<sub>3</sub>O<sub>2</sub>: C, 75.16; H, 6.31; N, 10.52. Found: C, 75.56; H, 6.64; N, 10.56.

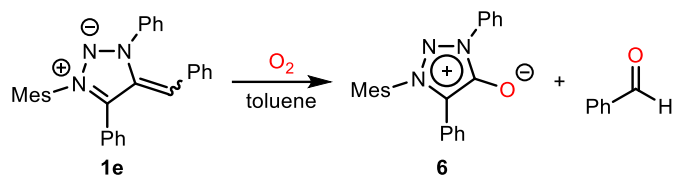

A solution of **1e** (214.8 mg, 0.50 mmol) in 5 mL of toluene under nitrogen was subjected to a freeze–pump–thaw cycle before 1 atm of O<sub>2</sub> was introduced into the flask. The mixture was stirred for 15 min at room temperature. All volatiles were removed under vacuum. The residue was purified by flash chromatography eluted with dichloromethane. Compound **6** was isolated as a white solid. Yield: 137.8 mg, 78%. Crystals suitable for X-ray crystallography were obtained by slow evaporation of an acetone solution to at room temperature. <sup>1</sup>H NMR (500 MHz, 25 °C, CDCl<sub>3</sub>) δ 8.26 – 8.17 (m, 2H, Ph-*H*), 7.56 – 7.46 (m, 4H, Ph-*H*), 7.41 – 7.35 (m, 1H, Ph-*H*), 7.29 – 7.21 (m, 2H, Ph-*H*), 7.22 – 7.17 (m, 1H, Ph-*H*), 7.03 (q, *J* = 0.8 Hz, 2H, Mes-*H*), 2.39 (s, 3H, Mes-CH<sub>3</sub>), 2.06 (s, 6H, Mes-CH<sub>3</sub>). <sup>13</sup>C NMR (126 MHz, 25 °C, CDCl<sub>3</sub>) δ 155.59 (triazole-*C*), 141.18 (Mes-*C*), 136.31 (Ph-*C*), 134.86 (Mes-*C*), 133.64 (Mes-*C*), 129.78 (Mes-*C*), 129.21 (Ph-*C*), 128.64 (Ph-*C*), 127.97 (Ph-*C*), 127.68 (Ph-*C*), 127.24, 125.35 (Ph-*C*), 121.32 (Ph-*C*), 118.94, 21.36 (Mes-CH<sub>3</sub>), 17.36 (Mes-CH<sub>3</sub>). Anal. Calcd for C<sub>23</sub>H<sub>21</sub>N<sub>3</sub>O: C, 77.72; H, 5.96; N, 11.82. Found: C, 77.53; H, 6.17; N, 11.62.

## 2. NMR spectra

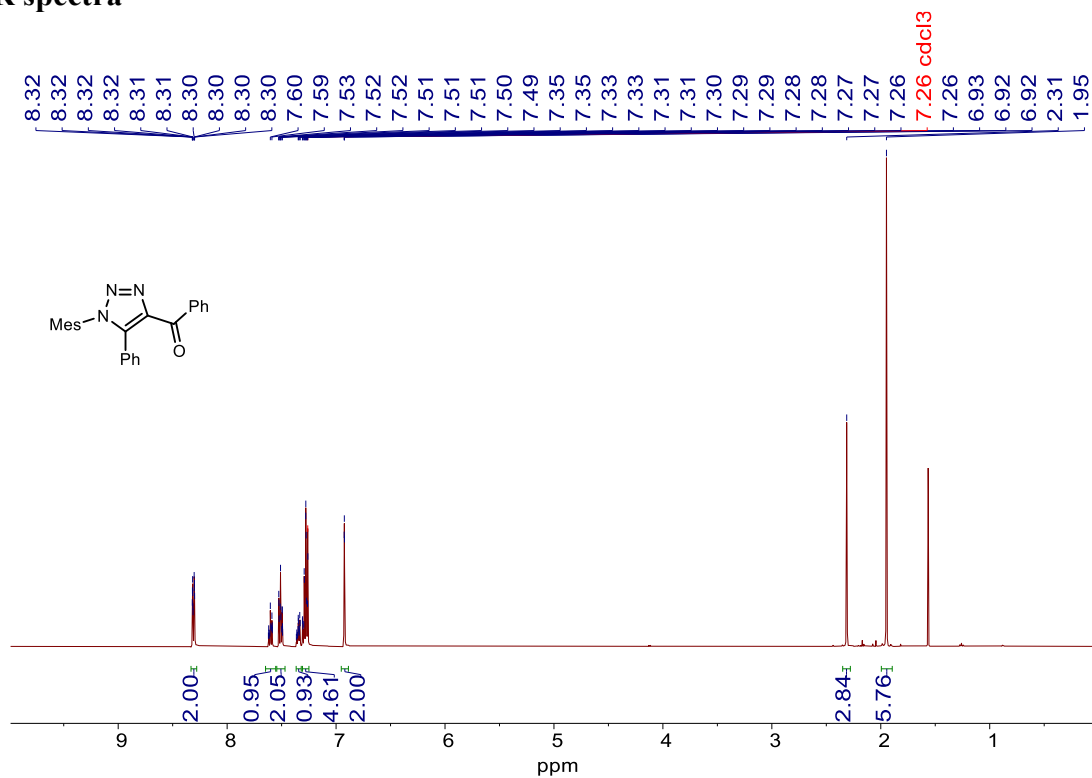

**Figure S1.** <sup>1</sup>H NMR (500 MHz, 25 °C, CDCl<sub>3</sub>) spectrum of (1-mesityl-5-phenyl-1,2,3-triazol-4-yl)(phenyl)-methanone.

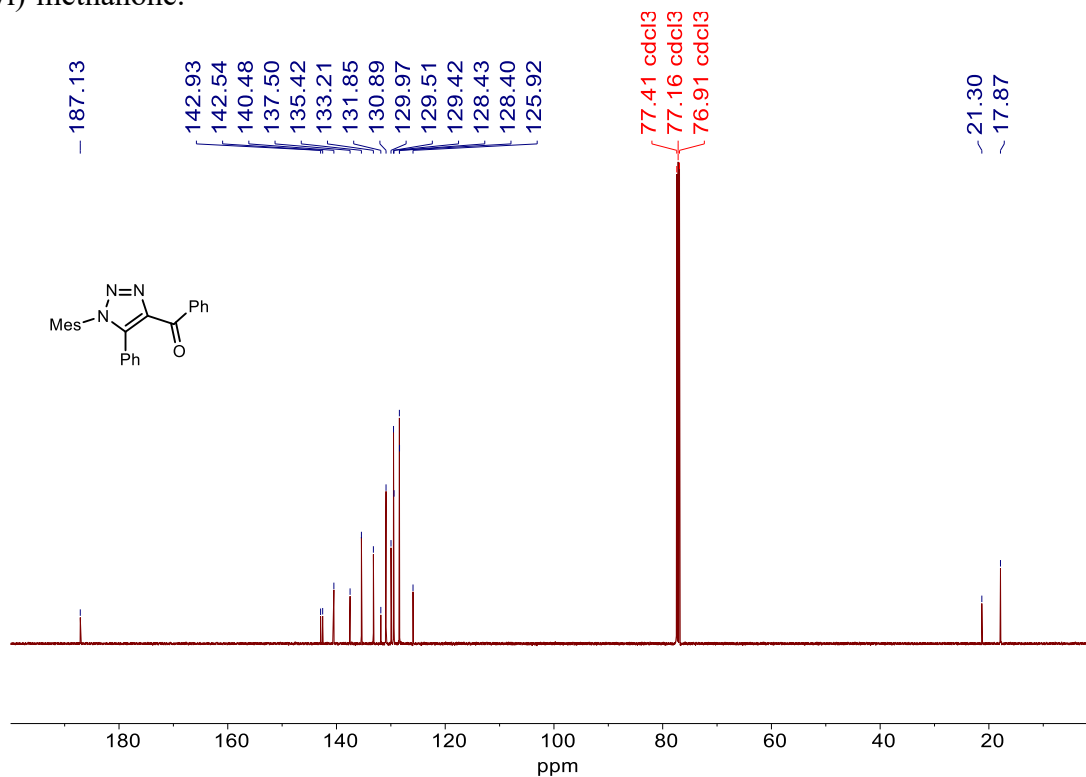

**Figure S2.** <sup>13</sup>C NMR (126 MHz, 25 °C, CDCl<sub>3</sub>) spectrum of (1-mesityl-5-phenyl-1,2,3-triazol-4-yl)(phenyl)-methanone.

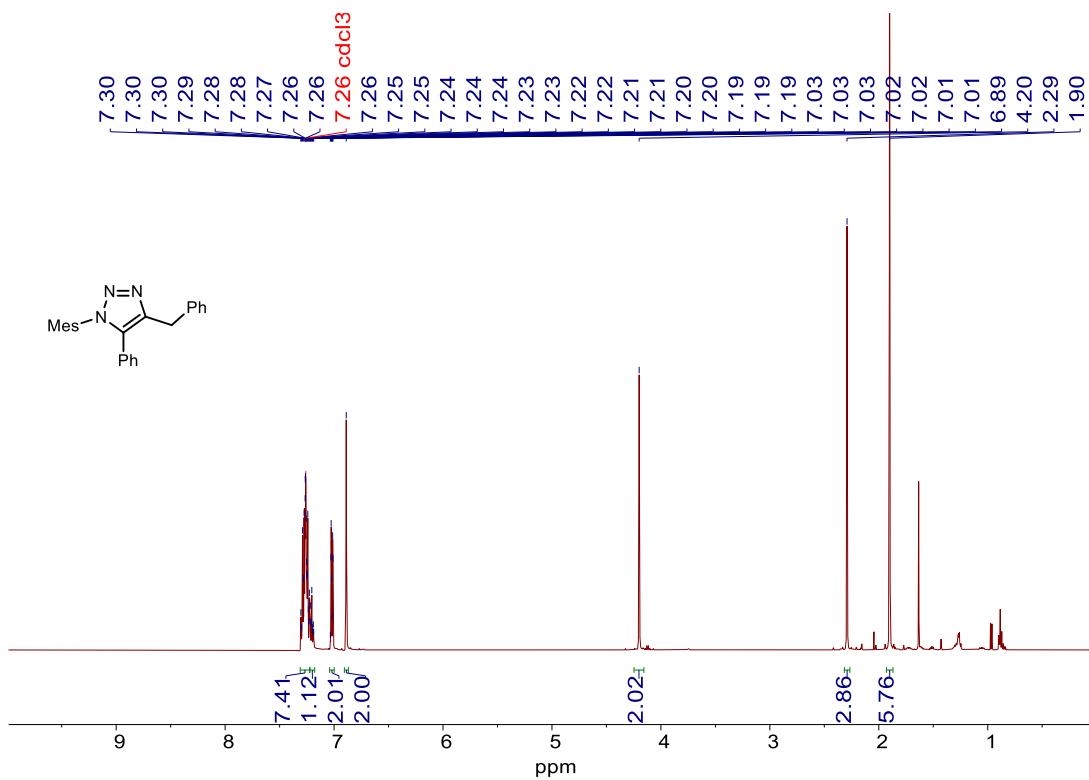

**Figure S3.** <sup>1</sup>H NMR (500 MHz, 25 °C, CDCl<sub>3</sub>) spectrum of 4-benzyl-1-mesityl-5-phenyl-1,2,3-triazole.

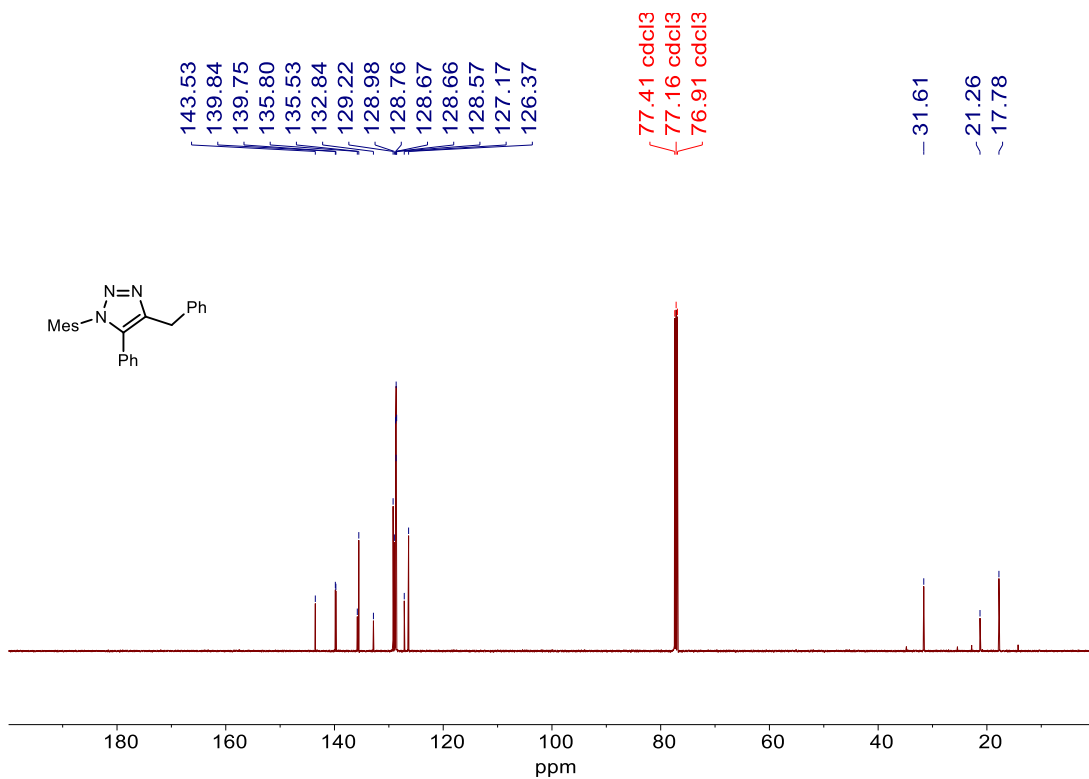

**Figure S4.** <sup>13</sup>C NMR (126 MHz, 25 °C, CDCl<sub>3</sub>) spectrum of 4-benzyl-1-mesityl-5-phenyl-1,2,3-triazole.

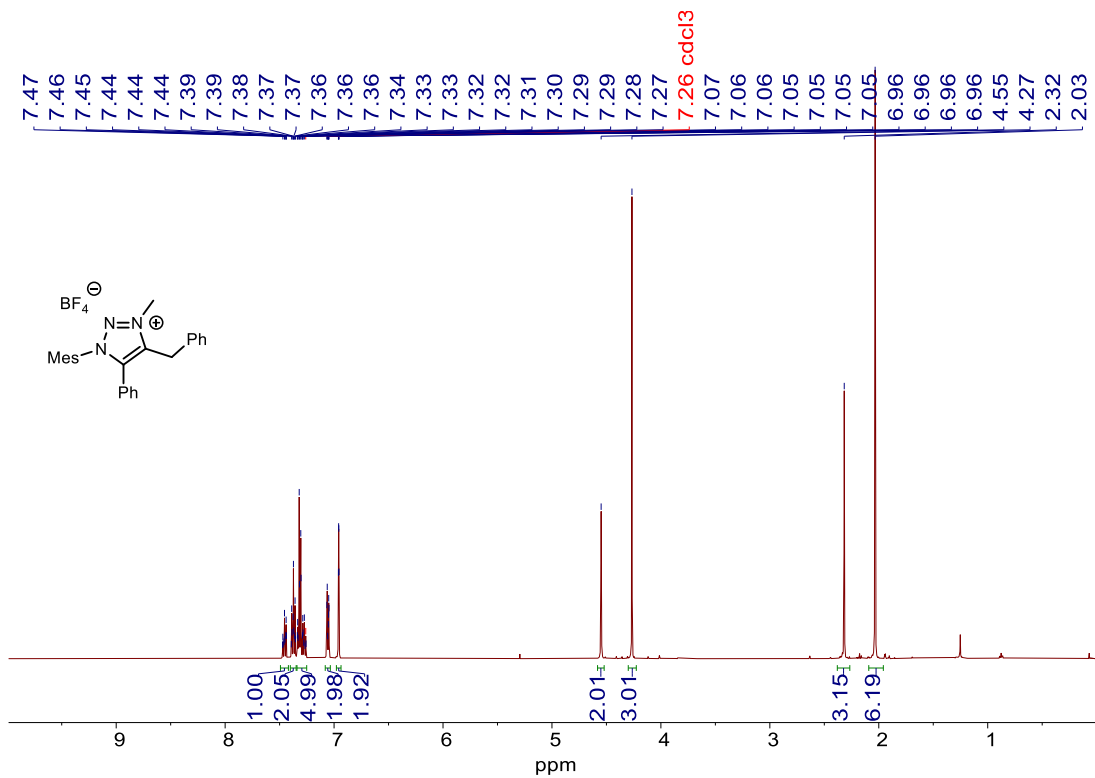

**Figure S5.**  $^1\text{H}$  NMR (500 MHz, 25 °C,  $\text{CDCl}_3$ ) spectrum of 4-benzyl-1-mesityl-3-methyl-5-phenyl-1,2,3-triazolium tetrafluoroborate.

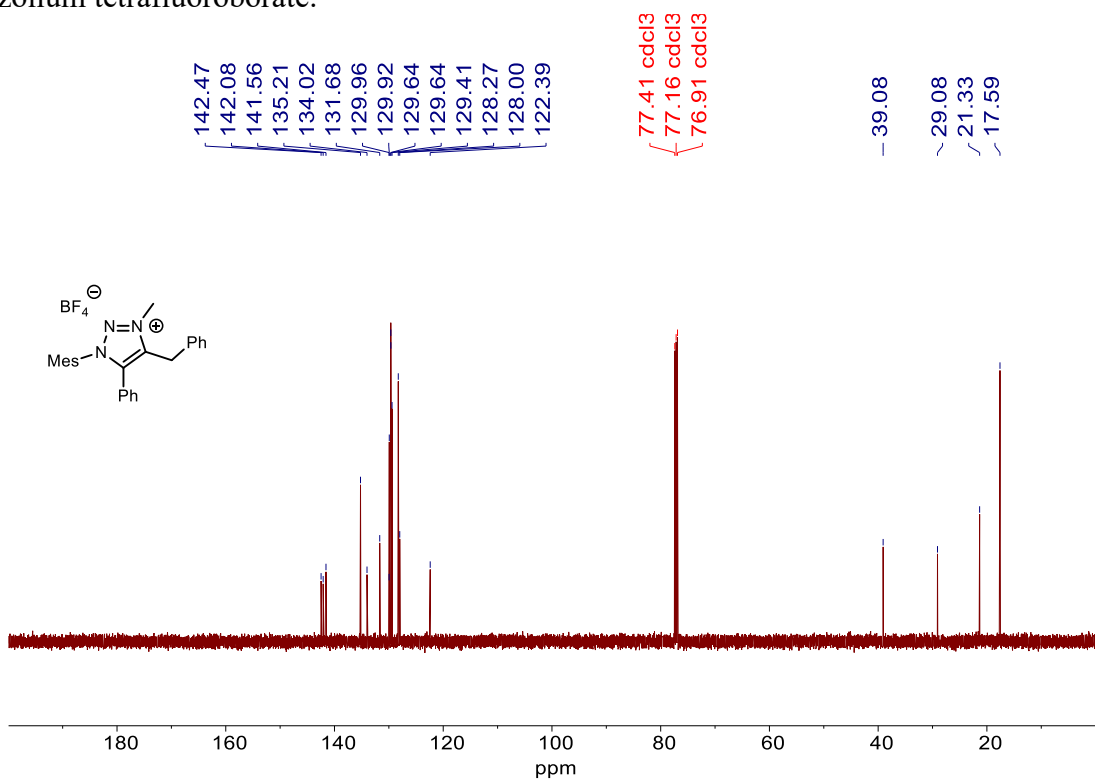

**Figure S6.**  $^{13}\text{C}$  NMR (126 MHz, 25 °C,  $\text{CDCl}_3$ ) spectrum of 4-benzyl-1-mesityl-3-methyl-5-phenyl-1,2,3-triazolium tetrafluoroborate.

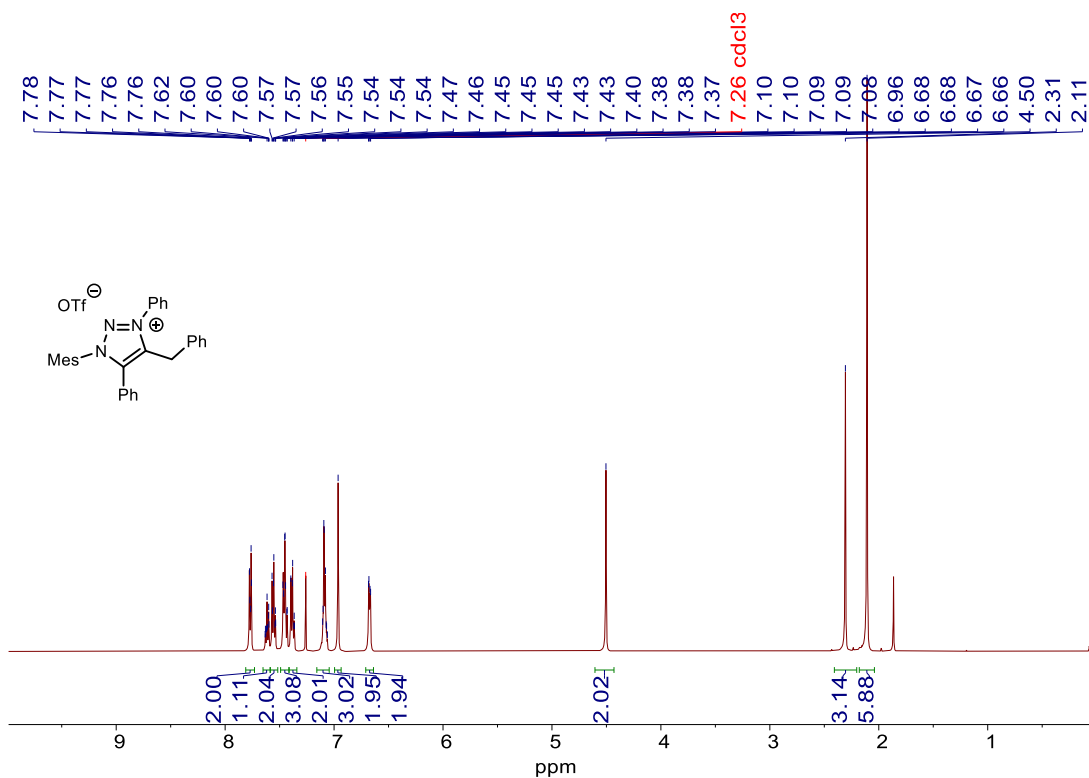

**Figure S7.**  $^1\text{H}$  NMR (500 MHz, 25 °C,  $\text{CDCl}_3$ ) spectrum of 4-benzyl-1-mesityl-3,5-diphenyl-1,2,3-triazolium triflate.

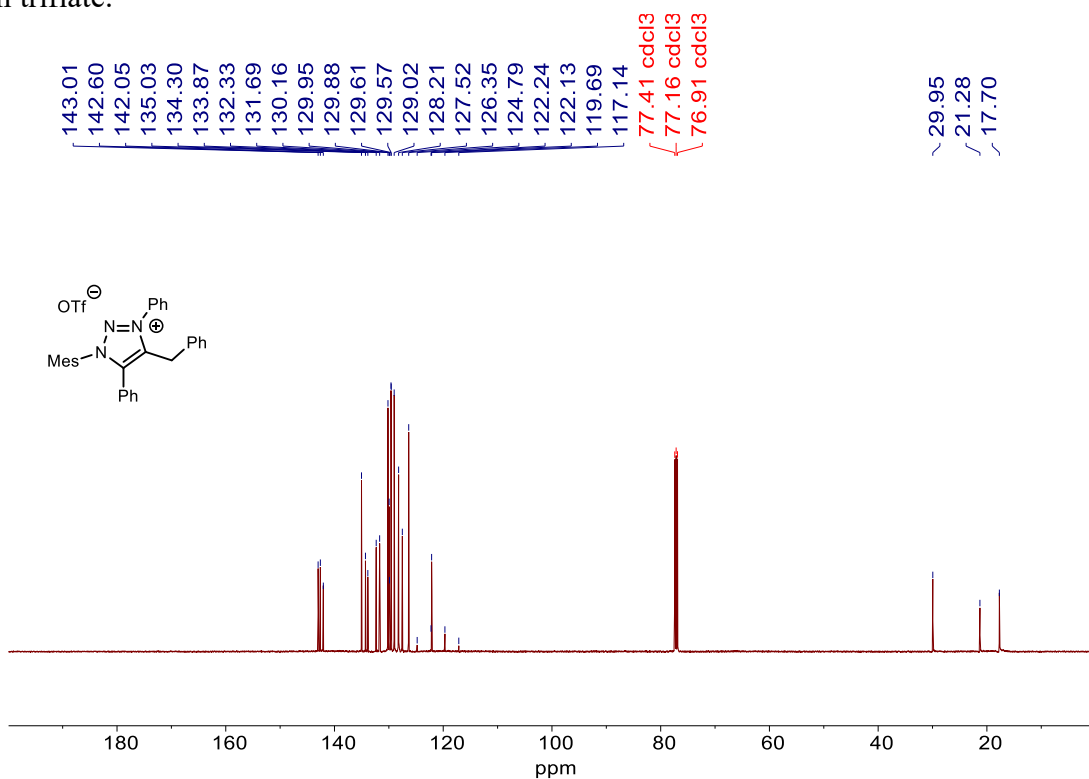

**Figure S8.**  $^{13}\text{C}$  NMR (126 MHz, 25 °C,  $\text{CDCl}_3$ ) spectrum of 4-benzyl-1-mesityl-3,5-diphenyl-1,2,3-triazolium triflate.

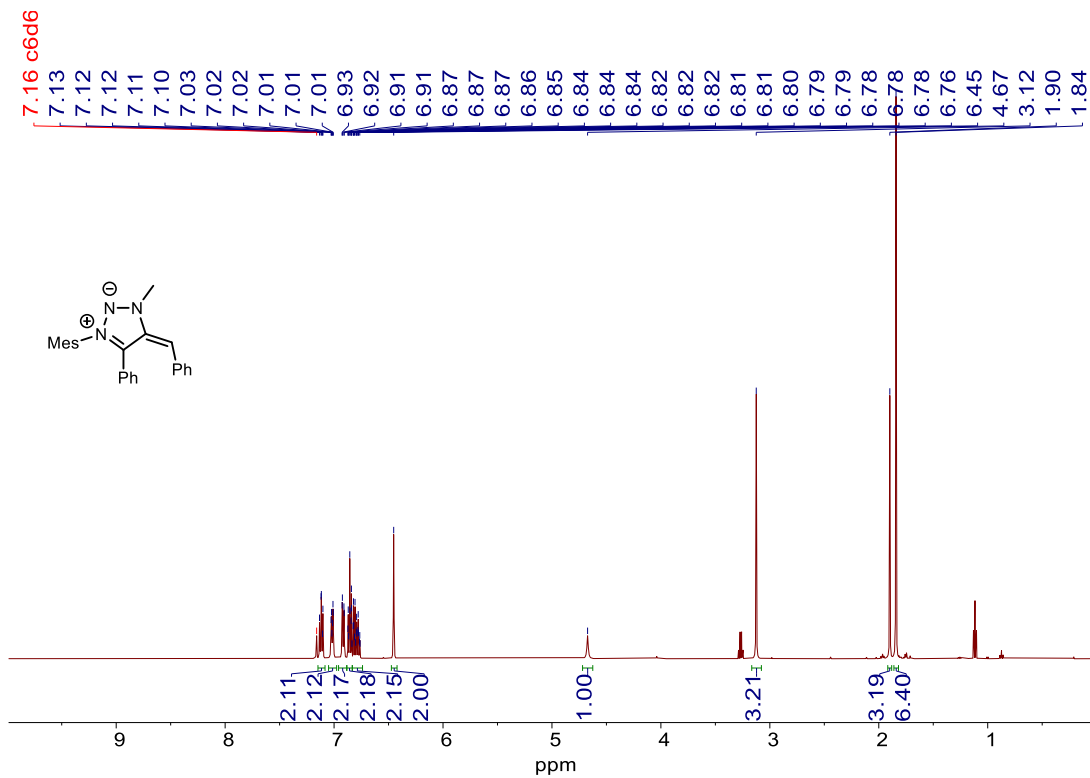

**Figure S9.**  $^1\text{H}$  NMR (500 MHz, 25 °C,  $\text{CDCl}_3$ ) spectrum of **1d**.

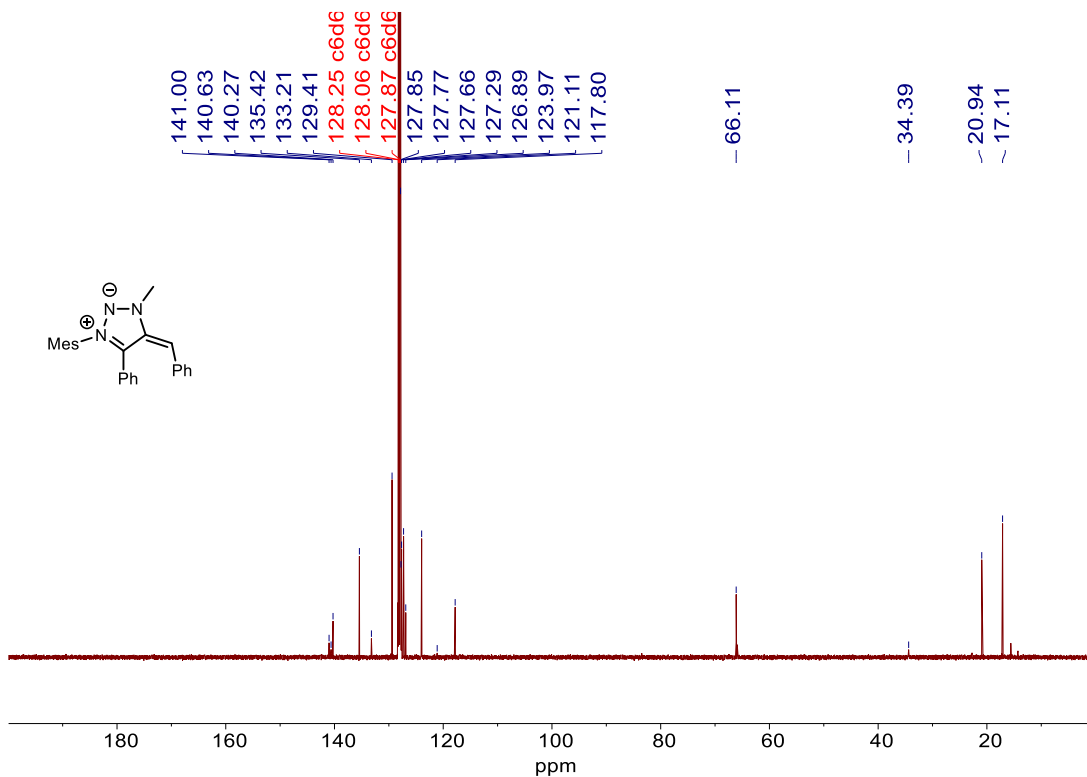

**Figure S10.**  $^{13}\text{C}$  NMR (126 MHz, 25 °C,  $\text{CDCl}_3$ ) spectrum of **1d**.

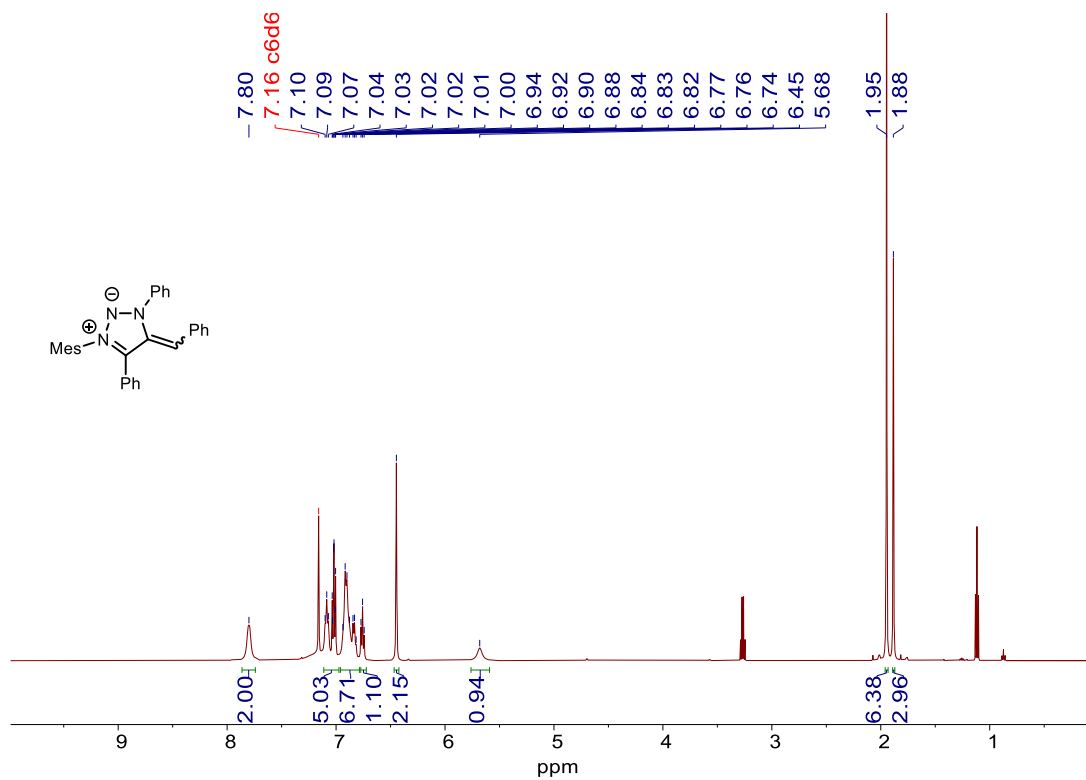

**Figure S11.** <sup>1</sup>H NMR (500 MHz, 25 °C, CDCl<sub>3</sub>) spectrum of **1e**.

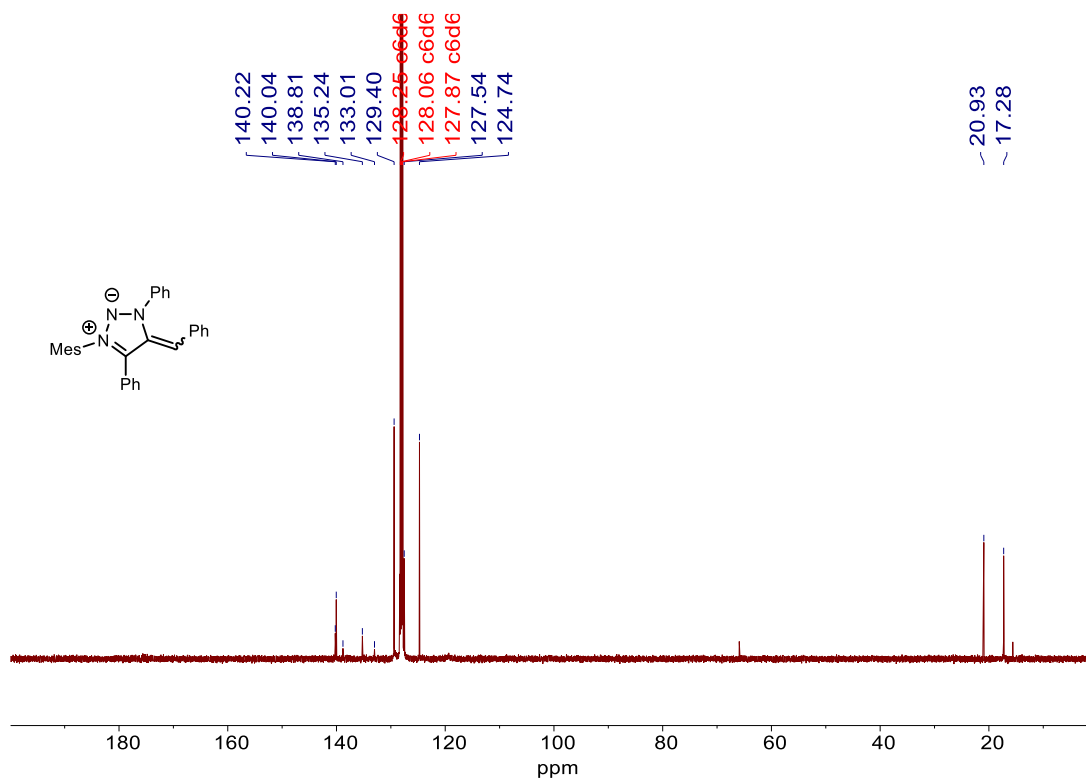

**Figure S12.** <sup>13</sup>C NMR (126 MHz, 25 °C, CDCl<sub>3</sub>) spectrum of **1e**.



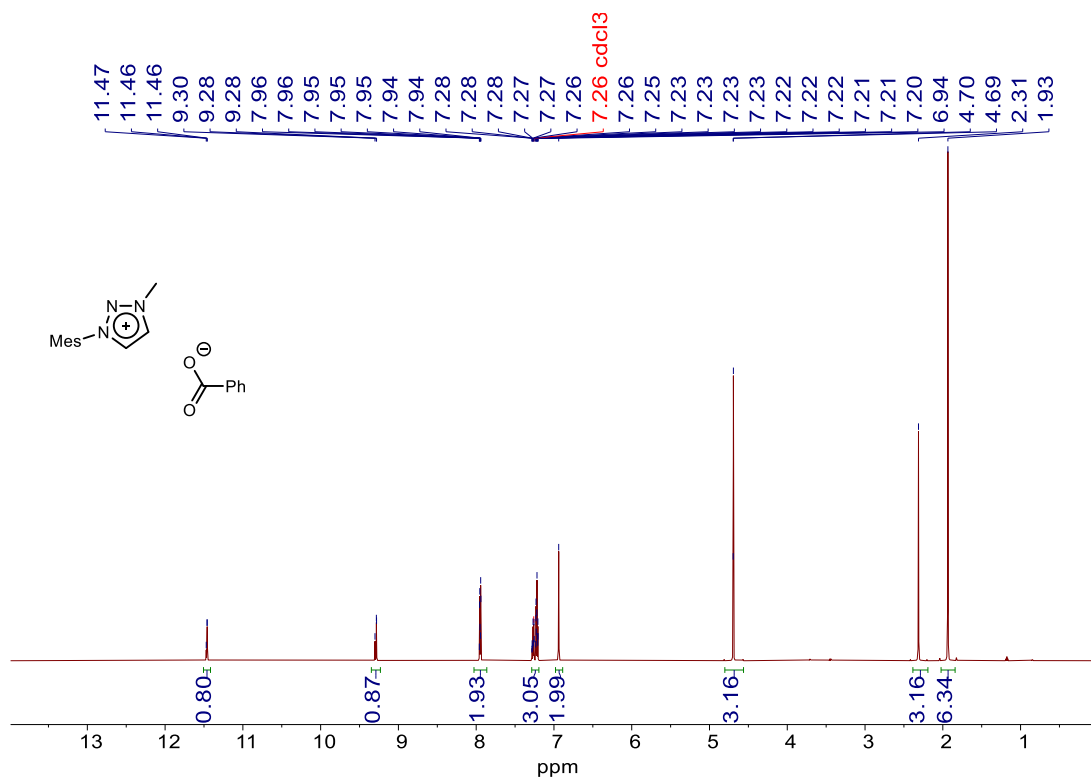

**Figure S13.** <sup>1</sup>H NMR (600 MHz, 25 °C, CDCl<sub>3</sub>) spectrum of 2.

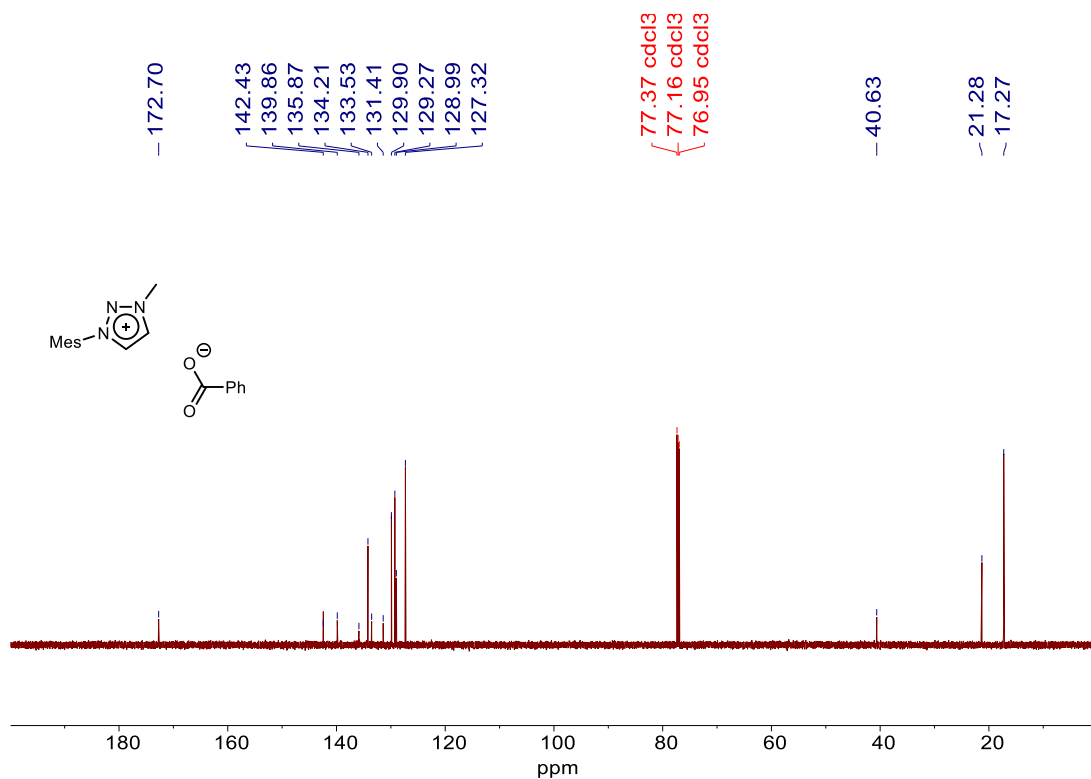

**Figure S14.** <sup>13</sup>C NMR (151 MHz, 25 °C, CDCl<sub>3</sub>) spectrum of 2.

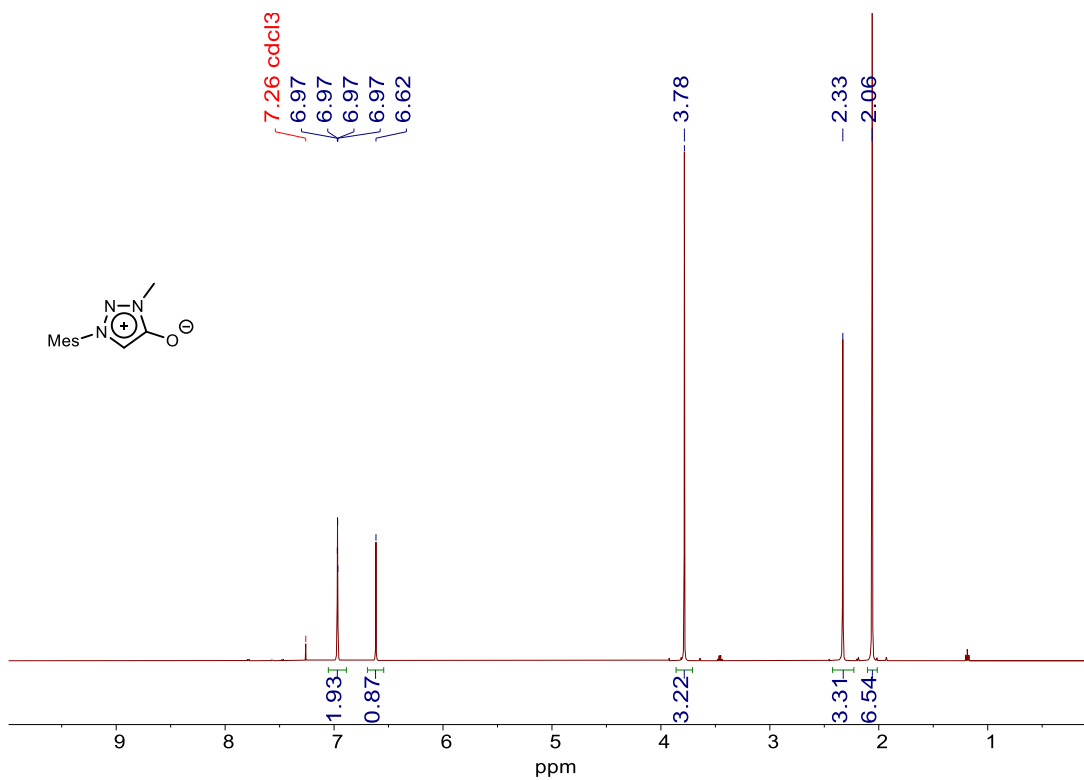

**Figure S15.** <sup>1</sup>H NMR (500 MHz, 25 °C, CDCl<sub>3</sub>) spectrum of **3**.

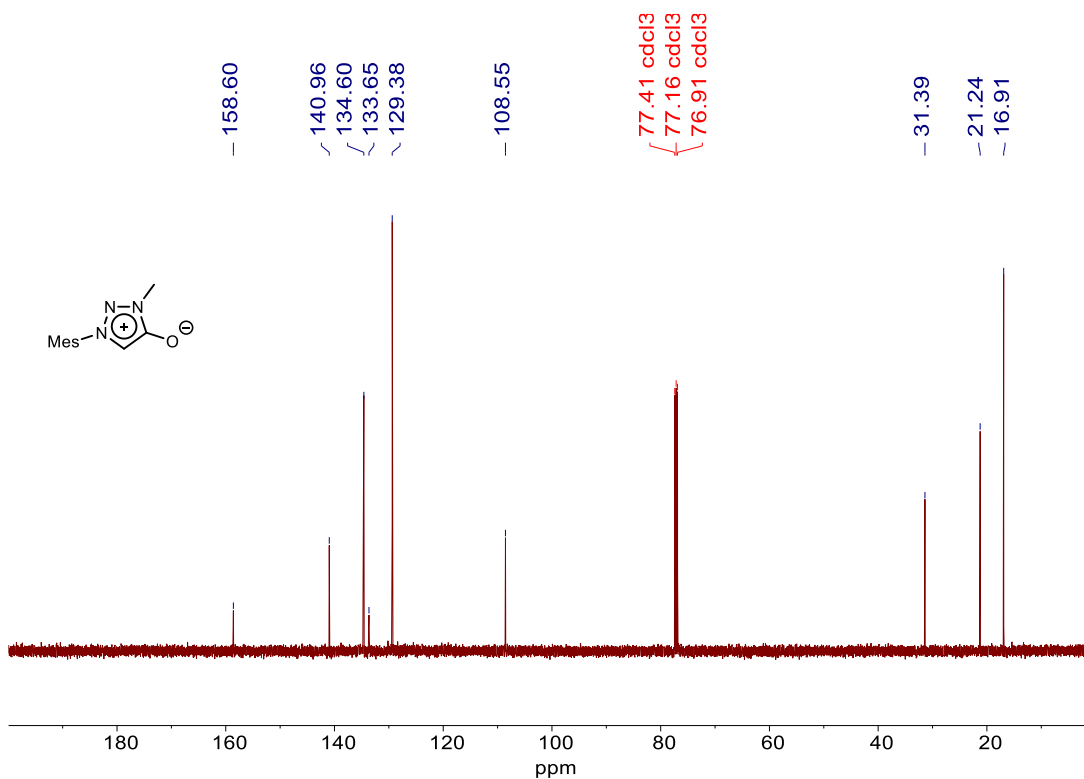

**Figure S16.** <sup>13</sup>C NMR (126 MHz, 25 °C, CDCl<sub>3</sub>) spectrum of **3**.

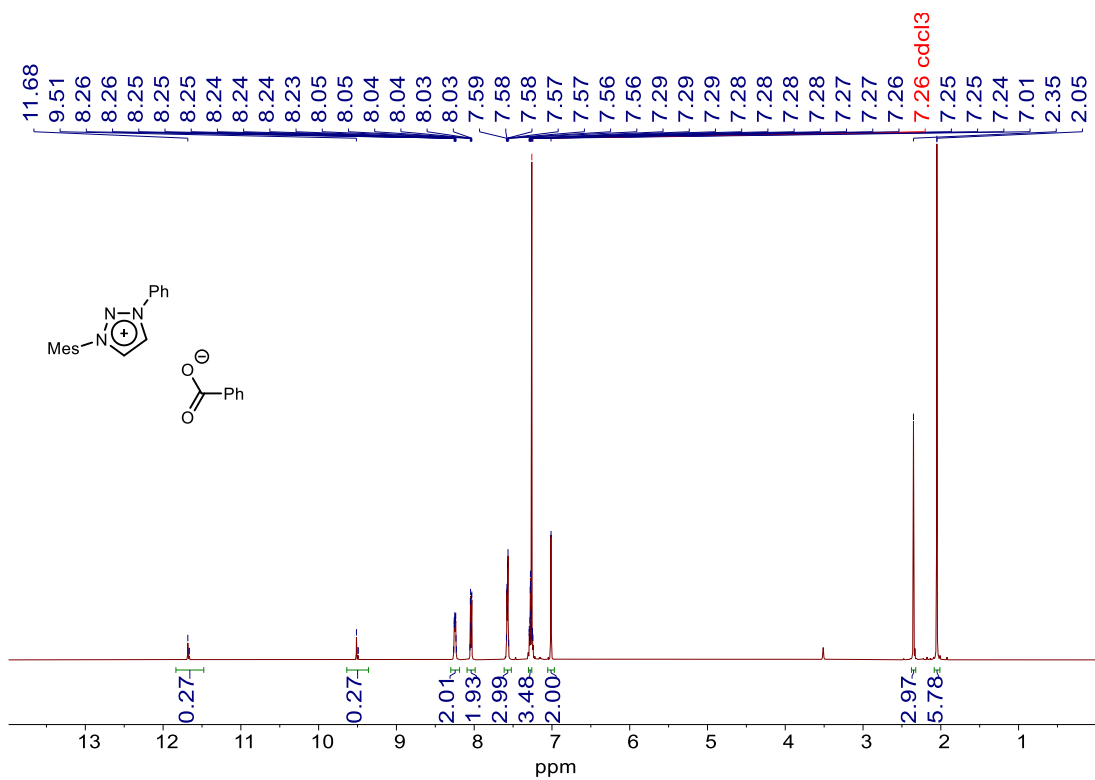

**Figure S17.**  $^1\text{H}$  NMR (500 MHz, 25 °C,  $\text{CDCl}_3$ ) spectrum of **4**.

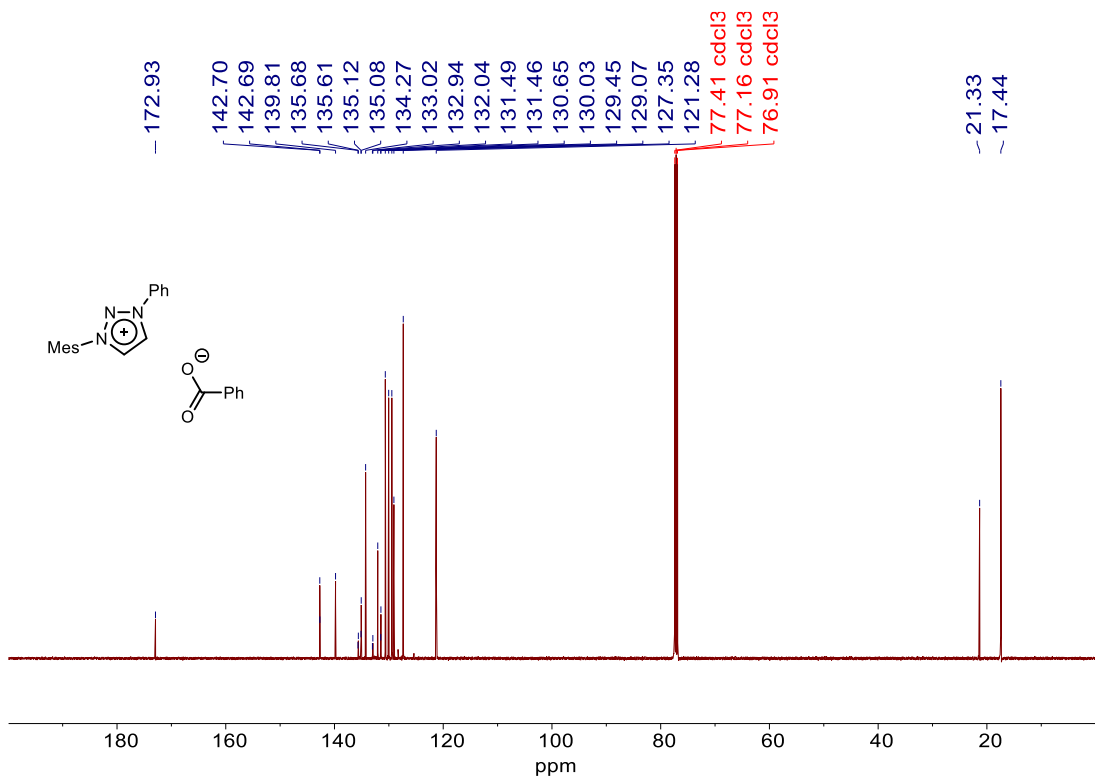

**Figure S18.**  $^{13}\text{C}$  NMR (126 MHz, 25 °C,  $\text{CDCl}_3$ ) spectrum of **4**.

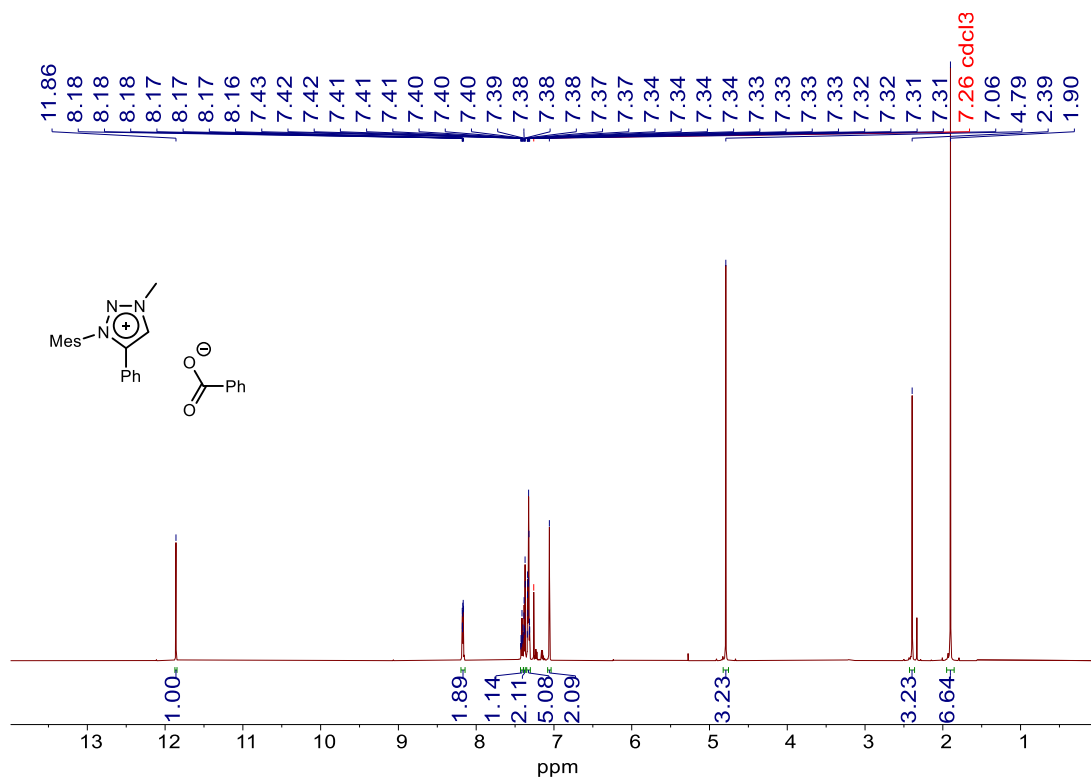

**Figure S19.**  $^1\text{H}$  NMR (600 MHz, 25 °C,  $\text{CDCl}_3$ ) spectrum of **5**.

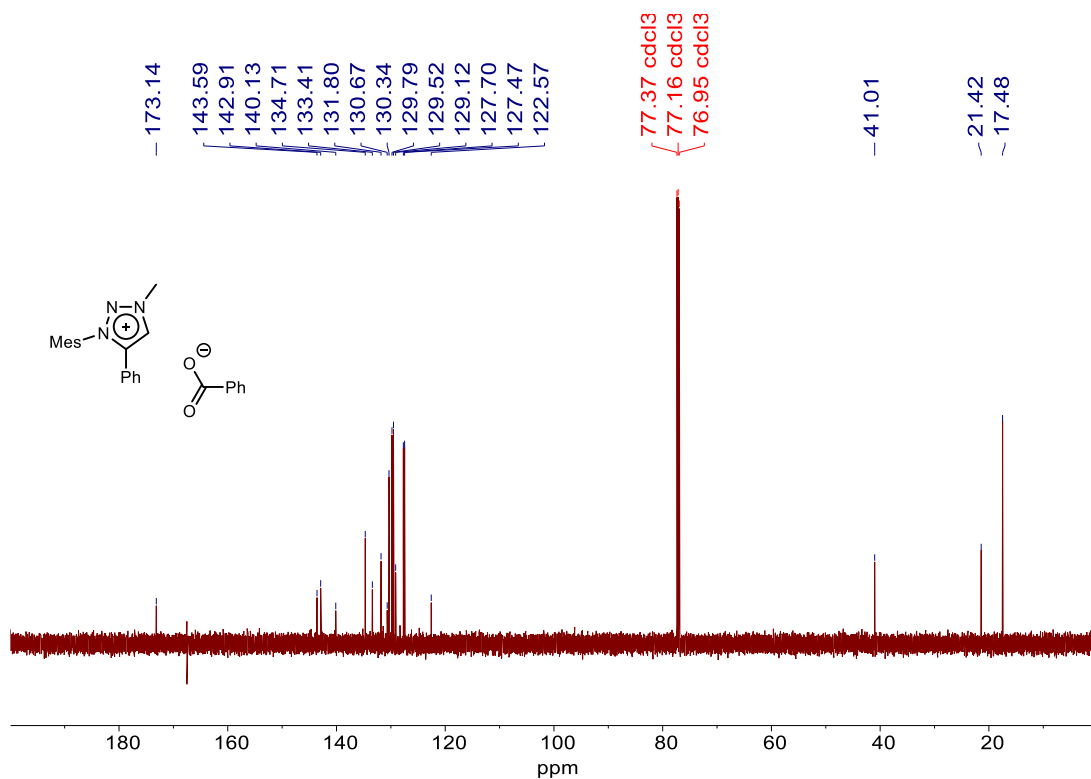

**Figure S20.**  $^{13}\text{C}$  NMR (151 MHz, 25 °C,  $\text{CDCl}_3$ ) spectrum of **5**.

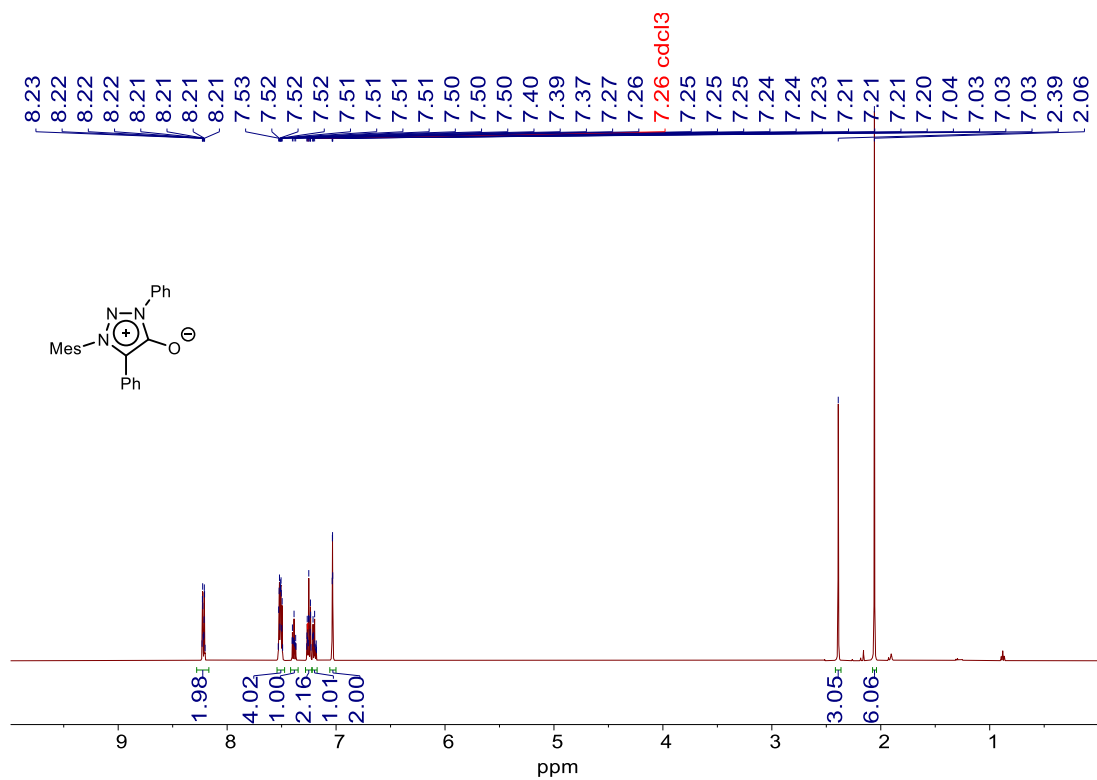

**Figure S21.** <sup>1</sup>H NMR (500 MHz, 25 °C, CDCl<sub>3</sub>) spectrum of 6.

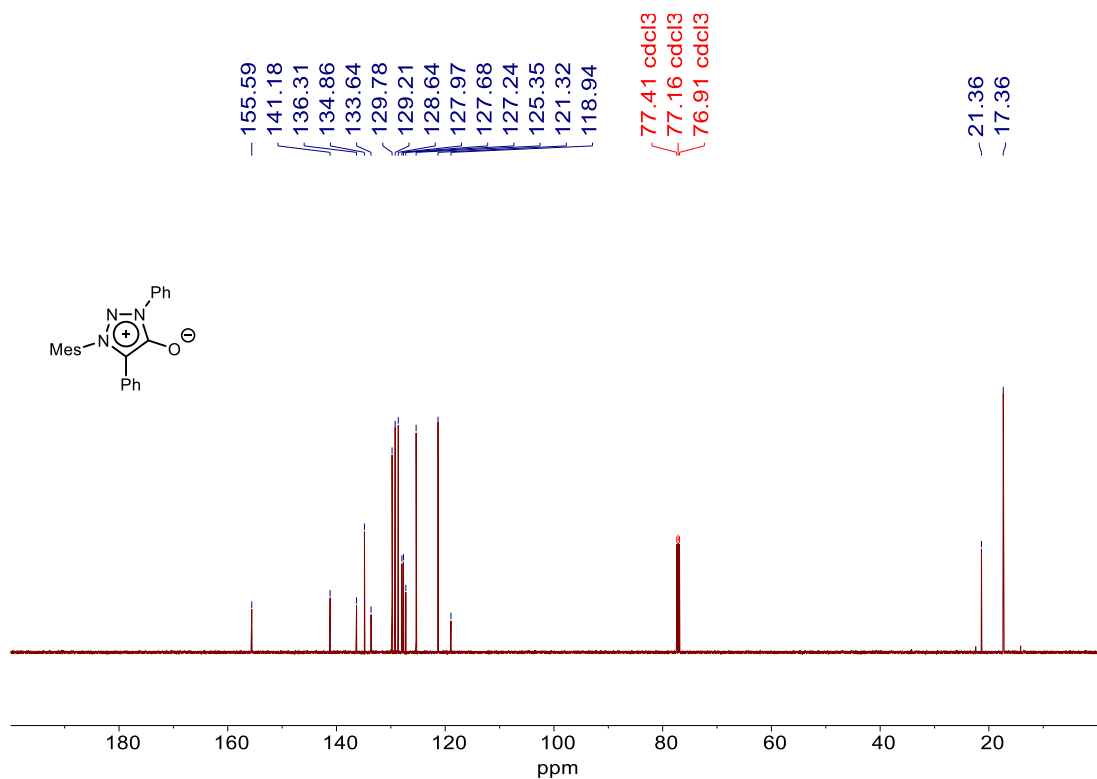

**Figure S22.** <sup>13</sup>C NMR (126 MHz, 25 °C, CDCl<sub>3</sub>) spectrum of 6.

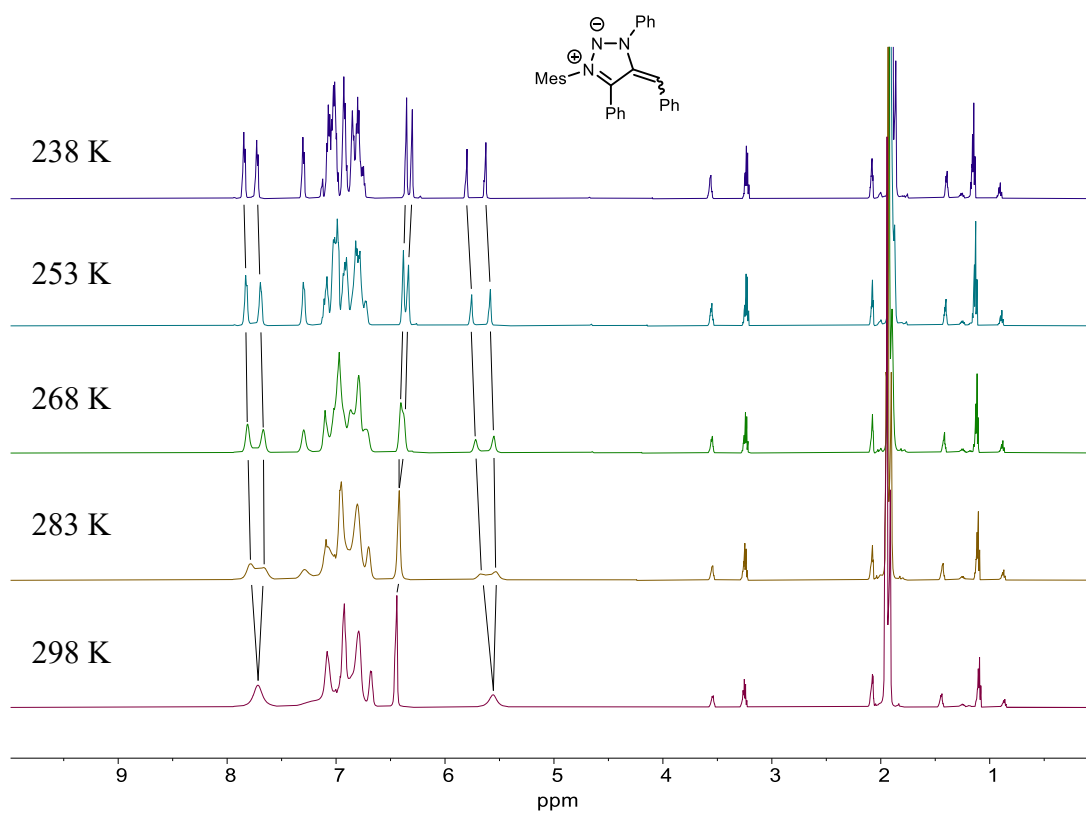

**Figure S23.** The  $^1\text{H}$  NMR spectra (600 MHz, toluene- $d_8$ ) of compound **1e** at 298, 283, 268, 253 and 238 K.

### 3. IR spectra

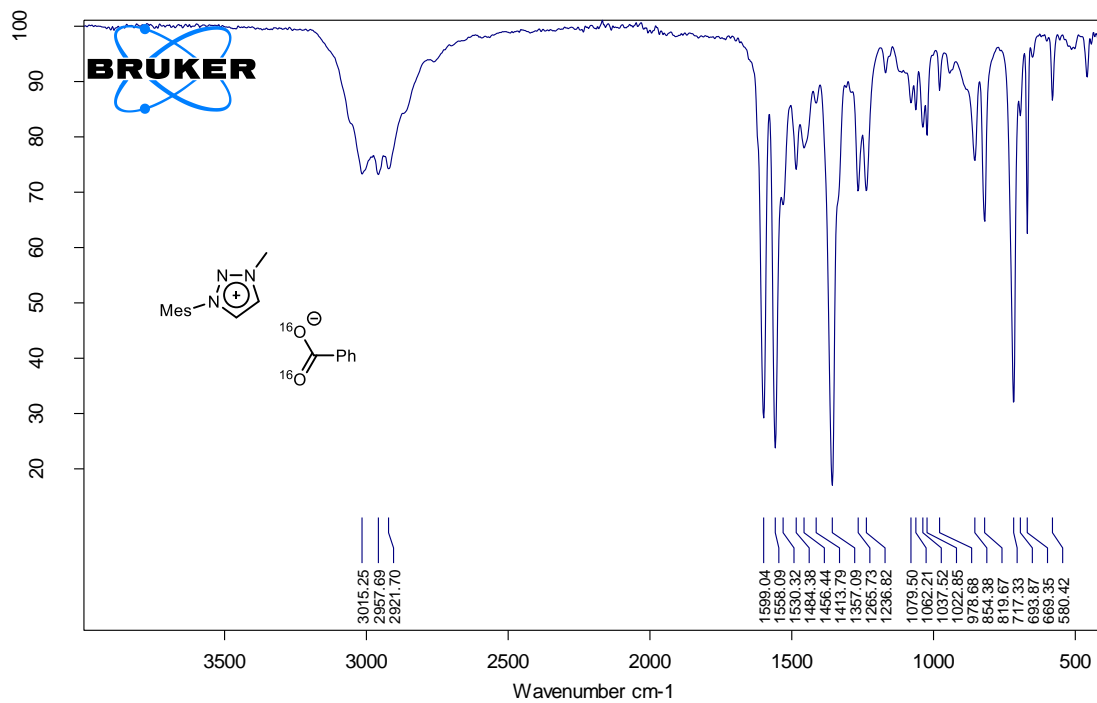

Figure S24. IR spectrum of 2-<sup>16</sup>O<sub>2</sub>.

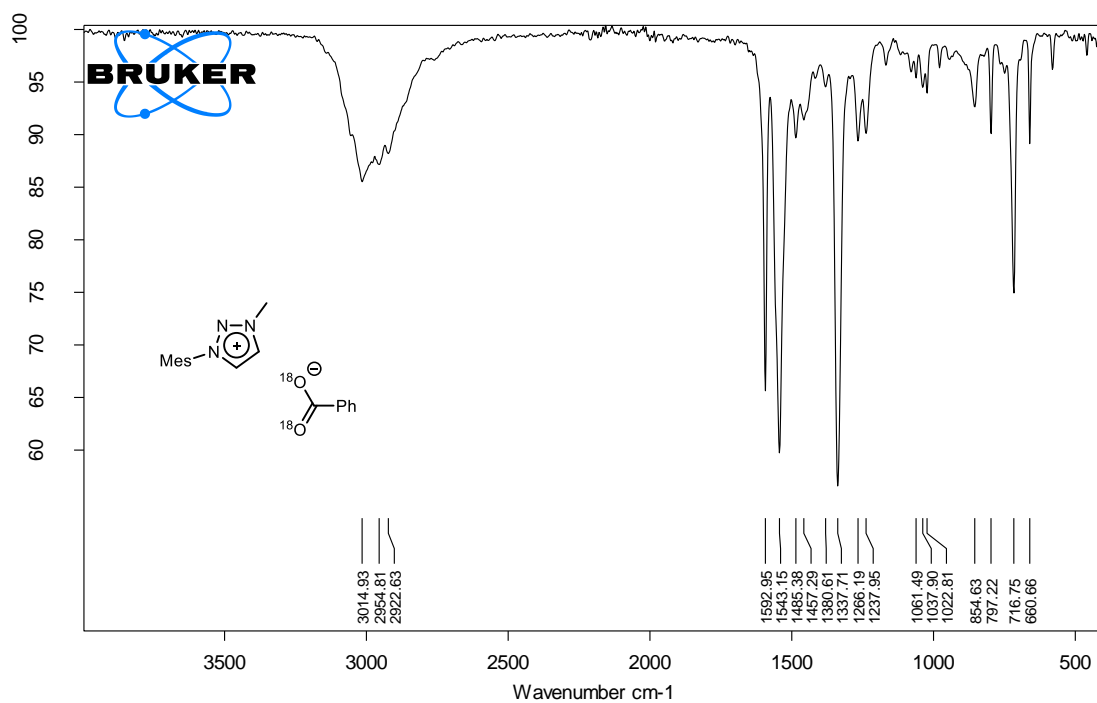

Figure S25. IR spectrum of 2-<sup>18</sup>O<sub>2</sub>.

## 4. HRMS

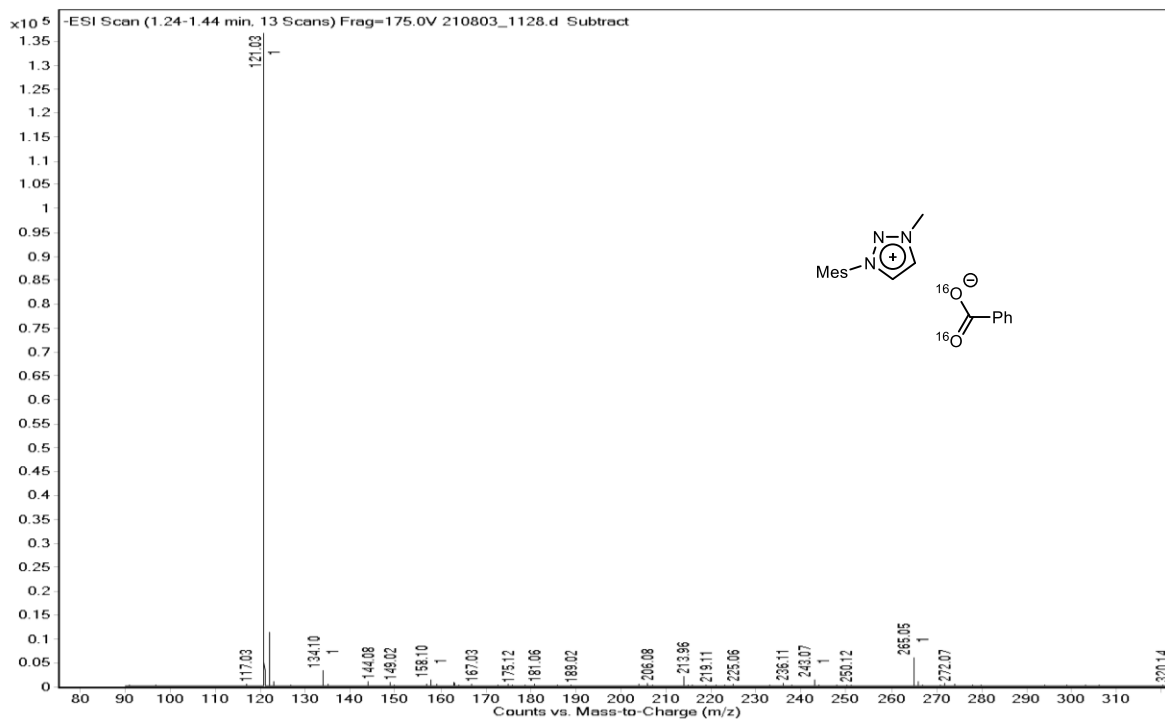

### Target Ion Species

| Ion Species | m/z      | Ionic Formula |
|-------------|----------|---------------|
| M-          | 121.0295 | C7 H5 O2      |

### MFG Calculator Results

| Target m/z | Ionic Formula | Calc m/z | +/- (mDa) | +/- (ppm) | DBE | MFG Score |
|------------|---------------|----------|-----------|-----------|-----|-----------|
| 121.0295   | C7 H5 O2      | 121.0295 | 0.0       | 0.0       | 5.5 | 87.83     |

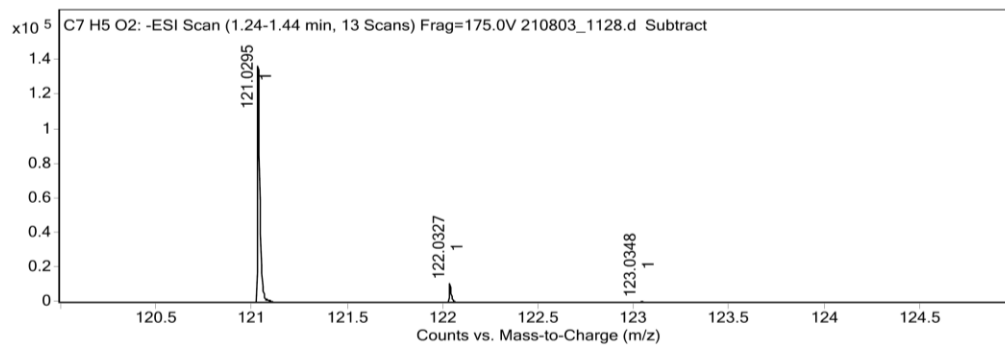

### Predicted Isotope Match Table

| Isotope | m/z      | Calc m/z | Diff (mDa) | Abund (%) | Calc Abund (%) | +/- |
|---------|----------|----------|------------|-----------|----------------|-----|
| 1       | 121.0295 | 121.0295 | 0.0        | 100.0     | 100.0          | 0.0 |
| 2       | 122.0327 | 122.0329 | -0.2       | 7.7       | 7.7            | 0.0 |

Figure S26. HRMS result of 2-<sup>16</sup>O<sub>2</sub>.



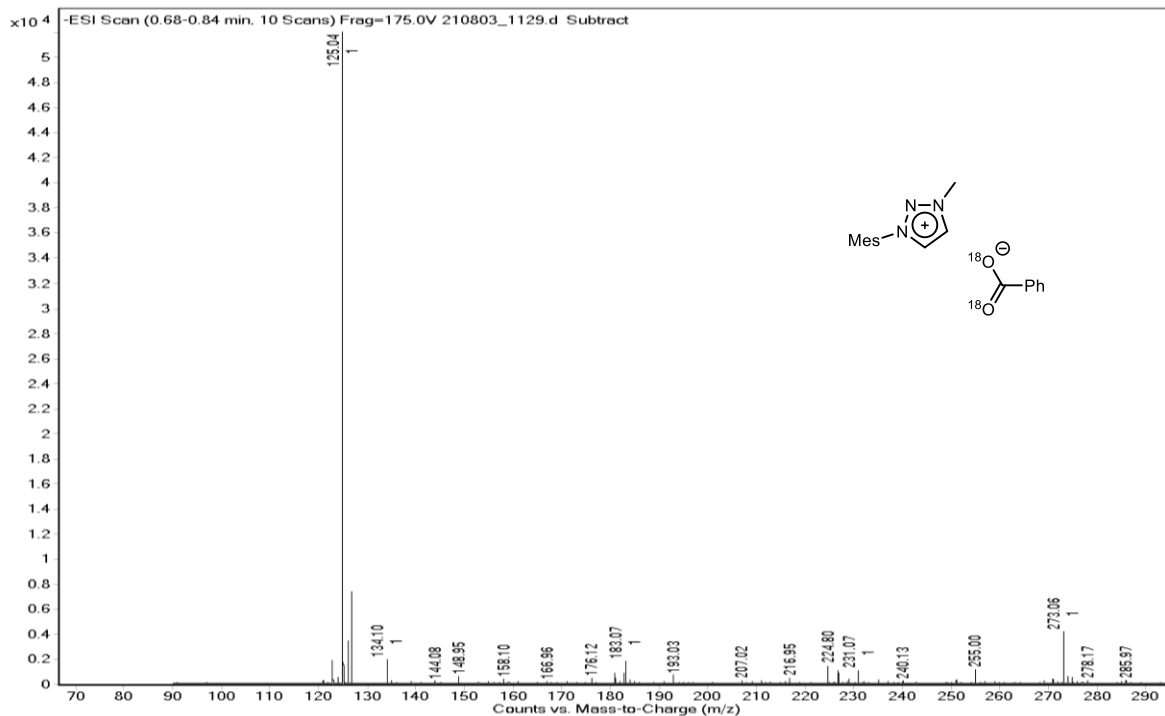

#### Target Ion Species

| Ion Species | m/z      | Ionic Formula |
|-------------|----------|---------------|
| M-          | 125.0381 | C7 H5 [18O]2  |

#### MFG Calculator Results

| Target m/z | Ionic Formula  | Calc m/z | +/- (mDa) | +/- (ppm) | DBE | MFG Score |
|------------|----------------|----------|-----------|-----------|-----|-----------|
| 125.0381   | C7 H5 [18O]2   | 125.0380 | 0.1       | 0.8       | 5.5 | 87.81     |
| 125.0381   | C10 H5         | 125.0397 | -1.6      | -12.8     | 8.5 | 69.82     |
| 125.0381   | C5 H5 N2 O2    | 125.0357 | 2.4       | 19.2      | 4.5 | 59.95     |
| 125.0381   | C4 H3 N4 [18O] | 125.0355 | 2.6       | 20.8      | 5.5 | 54.81     |

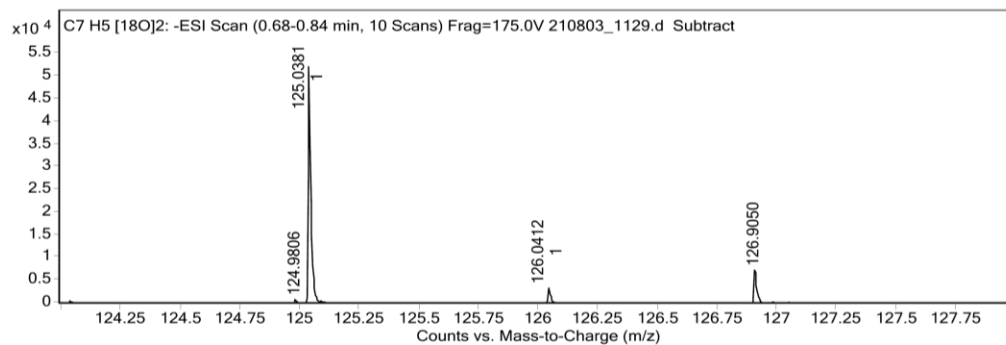

#### Predicted Isotope Match Table

| Isotope | m/z      | Calc m/z | Diff (mDa) | Abund (%) | Calc Abund (%) | +/- |
|---------|----------|----------|------------|-----------|----------------|-----|
| 1       | 125.0381 | 125.0380 | 0.1        | 100.0     | 100.0          | 0.0 |
| 2       | 126.0412 | 126.0414 | -0.2       | 7.2       | 7.6            | 0.4 |

Figure S27. HRMS result of 2-<sup>18</sup>O<sub>2</sub>.

## 5. X-ray crystallography

The X-ray diffraction data were collected on a Bruker Kappa Apex II / Photon II diffractometer with graphite-monochromated Mo K $\alpha$  radiation ( $\lambda = 0.71073$  Å) at 150 K controlled by an Oxford Cryostream 700 series low-temperature system and processed with the Bruker Apex 3 software package.<sup>6</sup> The structures were solved by direct methods and refined using SHELX-2016 software package.<sup>7,8</sup> All non-hydrogen atoms were refined anisotropically except for some of the atoms of the disordered BF<sub>4</sub><sup>-</sup> in C<sub>25</sub>H<sub>26</sub>N<sub>3</sub>BF<sub>4</sub>. Selected crystallographic data are summarized in Tables S1–S2.

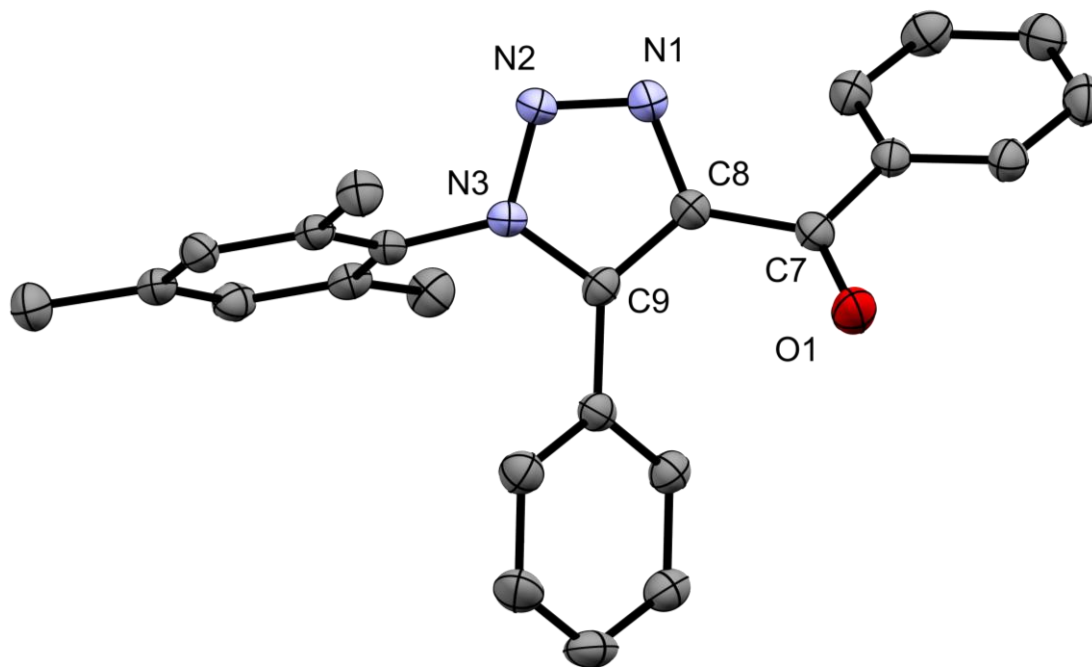

**Figure S28.** X-ray structure of C<sub>24</sub>H<sub>21</sub>N<sub>3</sub>O. Thermal ellipsoids are shown at 50% probability. All hydrogen atoms are omitted for clarity.

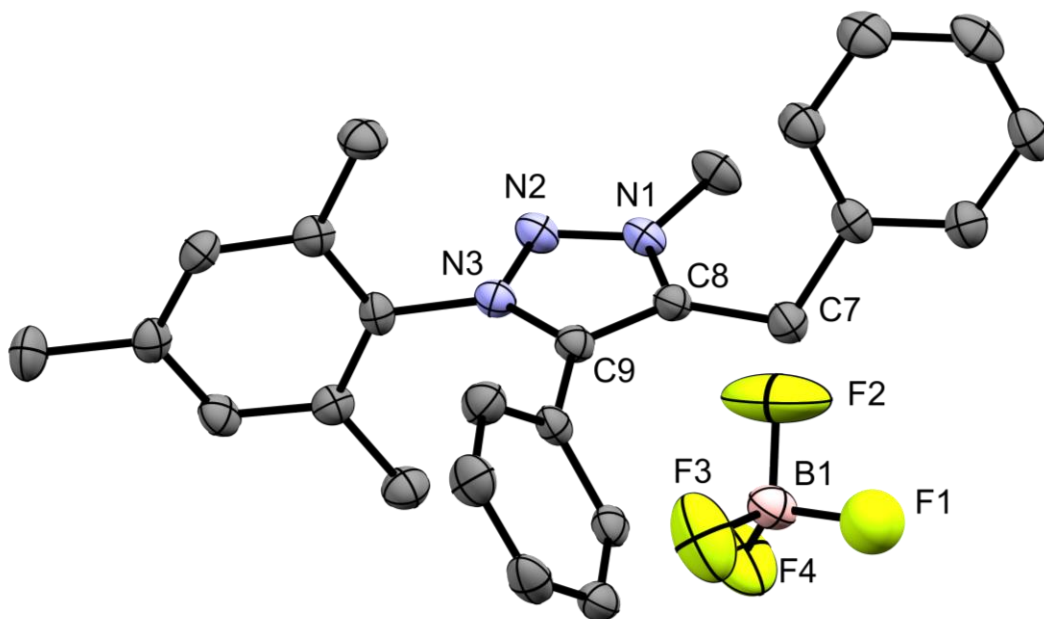

**Figure S29.** X-ray structure of  $C_{25}H_{26}N_3BF_4$ . Thermal ellipsoids are shown at 50% probability. All hydrogen atoms are omitted for clarity.

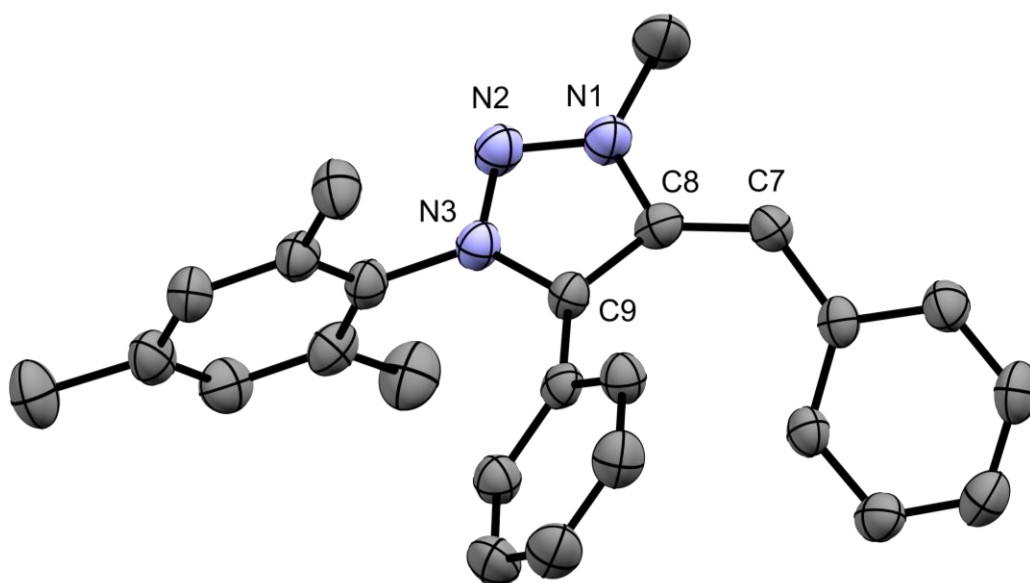

**Figure S30.** X-ray structure of **1d**. Thermal ellipsoids are shown at 50% probability. All hydrogen atoms are omitted for clarity.

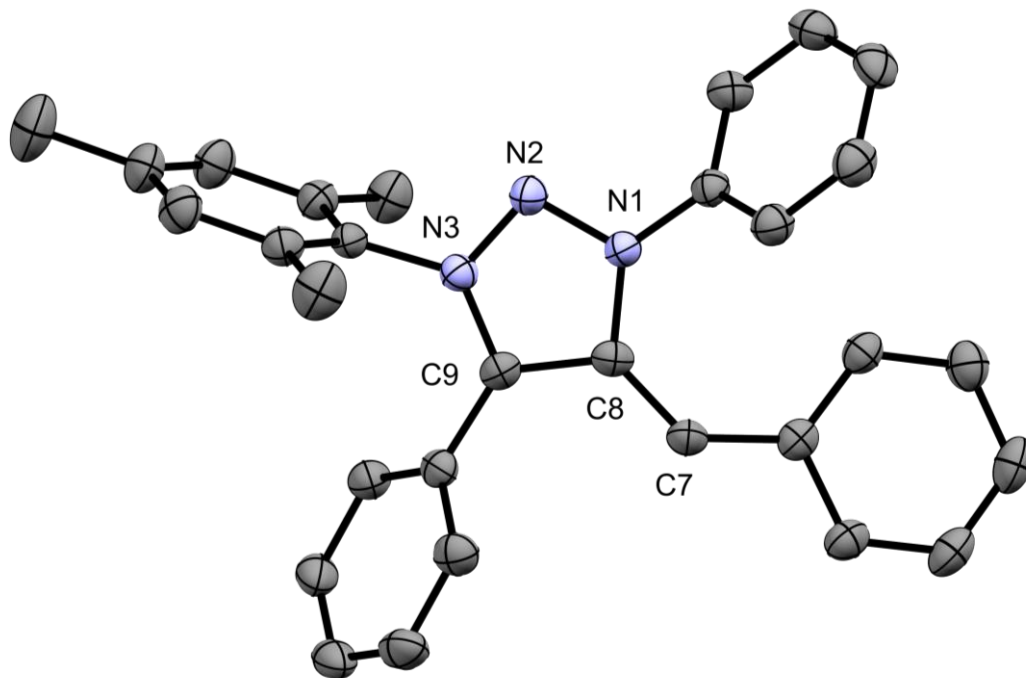

**Figure S31.** X-ray structure of **1e**. Thermal ellipsoids are shown at 50% probability. All hydrogen atoms are omitted for clarity.

**Table S1.** Selected crystallographic data for compounds **2**, **3**, **4•CH<sub>2</sub>Cl<sub>2</sub>**, **5**, and **6**.

|                                            | <b>2</b>                                                      | <b>3</b>                                         | <b>4•CH<sub>2</sub>Cl<sub>2</sub></b>                                         | <b>5</b>                                                      | <b>6</b>                                         |
|--------------------------------------------|---------------------------------------------------------------|--------------------------------------------------|-------------------------------------------------------------------------------|---------------------------------------------------------------|--------------------------------------------------|
| Empirical formula                          | C <sub>19</sub> H <sub>21</sub> N <sub>3</sub> O <sub>2</sub> | C <sub>12</sub> H <sub>15</sub> N <sub>3</sub> O | C <sub>25</sub> H <sub>25</sub> N <sub>3</sub> O <sub>2</sub> Cl <sub>2</sub> | C <sub>25</sub> H <sub>25</sub> N <sub>3</sub> O <sub>2</sub> | C <sub>23</sub> H <sub>21</sub> N <sub>3</sub> O |
| FW (g·mol <sup>-1</sup> )                  | 323.39                                                        | 217.27                                           | 470.38                                                                        | 399.48                                                        | 355.43                                           |
| Crystal system                             | Triclinic                                                     | Monoclinic                                       | Triclinic                                                                     | Monoclinic                                                    | Monoclinic                                       |
| Space Group                                | P-1                                                           | P2 <sub>1</sub> /n                               | P-1                                                                           | P2 <sub>1</sub> /n                                            | C2/c                                             |
| Z                                          | 2                                                             | 12                                               | 2                                                                             | 4                                                             | 8                                                |
| a (Å)                                      | 7.554(5)                                                      | 10.765(4)                                        | 11.279(3)                                                                     | 16.149(5)                                                     | 21.598(6)                                        |
| b (Å)                                      | 7.800(5)                                                      | 8.899(3)                                         | 11.539(4)                                                                     | 6.597(2)                                                      | 10.343(3)                                        |
| c (Å)                                      | 15.305(10)                                                    | 37.044(15)                                       | 11.879(4)                                                                     | 21.350(7)                                                     | 18.170(5)                                        |
| α (deg)                                    | 96.293(19)                                                    | 90                                               | 93.664(11)                                                                    | 90                                                            | 90                                               |
| β (deg)                                    | 90.202(18)                                                    | 94.947(13)                                       | 116.197(9)                                                                    | 104.183(10)                                                   | 109.301(7)                                       |
| γ (deg)                                    | 99.553(18)                                                    | 90                                               | 115.492(9)                                                                    | 90                                                            | 90                                               |
| V (Å <sup>3</sup> )                        | 883.7(10)                                                     | 3536(2)                                          | 1189.0(7)                                                                     | 2205.3(12)                                                    | 3830.7(17)                                       |
| D <sub>calcd</sub> , (g·cm <sup>-3</sup> ) | 1.215                                                         | 1.225                                            | 1.314                                                                         | 1.203                                                         | 1.233                                            |
| μ (mm <sup>-1</sup> )                      | 0.080                                                         | 0.081                                            | 0.300                                                                         | 0.077                                                         | 0.077                                            |
| F(000)                                     | 344                                                           | 1392                                             | 492                                                                           | 848                                                           | 1504                                             |
| no. of obsd reflns                         | 2090                                                          | 6287                                             | 4429                                                                          | 3396                                                          | 3377                                             |
| no. of params refnd                        | 232                                                           | 446                                              | 292                                                                           | 275                                                           | 248                                              |
| goodness of fit                            | 1.006                                                         | 1.027                                            | 1.048                                                                         | 1.031                                                         | 1.032                                            |
| R <sub>1</sub> (I>2σ)                      | 0.0607                                                        | 0.0582                                           | 0.0428                                                                        | 0.0599                                                        | 0.0418                                           |
| wR <sub>2</sub>                            | 0.1583                                                        | 0.1529                                           | 0.1239                                                                        | 0.1734                                                        | 0.1155                                           |

**Table S2.** Selected crystallographic data for compounds **C<sub>24</sub>H<sub>21</sub>N<sub>3</sub>O**, **C<sub>25</sub>H<sub>26</sub>N<sub>3</sub>BF<sub>4</sub>**, **1d**, and **1e**.

|                                            | <b>C<sub>24</sub>H<sub>21</sub>N<sub>3</sub>O</b> | <b>C<sub>25</sub>H<sub>26</sub>N<sub>3</sub>BF<sub>4</sub></b> | <b>1d</b>                                      | <b>1e</b>                                      |
|--------------------------------------------|---------------------------------------------------|----------------------------------------------------------------|------------------------------------------------|------------------------------------------------|
| Empirical formula                          | C <sub>24</sub> H <sub>21</sub> N <sub>3</sub> O  | C <sub>25</sub> H <sub>26</sub> N <sub>3</sub> BF <sub>4</sub> | C <sub>25</sub> H <sub>25</sub> N <sub>3</sub> | C <sub>30</sub> H <sub>27</sub> N <sub>3</sub> |
| FW (g·mol <sup>-1</sup> )                  | 367.44                                            | 455.30                                                         | 367.48                                         | 429.54                                         |
| Crystal system                             | Orthorhombic                                      | Monoclinic                                                     | Orthorhombic                                   | Monoclinic                                     |
| Space Group                                | Pbca                                              | P2 <sub>1</sub> /n                                             | Fdd2                                           | P2 <sub>1</sub> /c                             |
| Z                                          | 8                                                 | 4                                                              | 16                                             | 4                                              |
| a (Å)                                      | 19.077(7)                                         | 11.045(6)                                                      | 25.226(9)                                      | 8.500(2)                                       |
| b (Å)                                      | 8.652(3)                                          | 13.979(6)                                                      | 45.845(16)                                     | 24.610(8)                                      |
| c (Å)                                      | 23.320(8)                                         | 14.811(6)                                                      | 7.020(3)                                       | 12.044(3)                                      |
| α (deg)                                    | 90                                                | 90                                                             | 90                                             | 90                                             |
| β (deg)                                    | 90                                                | 93.520(13)                                                     | 90                                             | 110.619(15)                                    |
| γ (deg)                                    | 90                                                | 90                                                             | 90                                             | 90                                             |
| V (Å <sup>3</sup> )                        | 3849(2)                                           | 2282.4(18)                                                     | 8119(5)                                        | 2358.1(12)                                     |
| D <sub>calcd</sub> , (g·cm <sup>-3</sup> ) | 1.268                                             | 1.325                                                          | 1.203                                          | 1.210                                          |
| μ (mm <sup>-1</sup> )                      | 0.079                                             | 0.101                                                          | 0.071                                          | 0.071                                          |
| F(000)                                     | 1552                                              | 952                                                            | 3136                                           | 912                                            |
| no. of obsd reflns                         | 3104                                              | 2849                                                           | 3419                                           | 3265                                           |
| no. of params refnd                        | 257                                               | 301                                                            | 262                                            | 306                                            |
| goodness of fit                            | 1.049                                             | 1.022                                                          | 1.045                                          | 1.032                                          |
| R <sub>1</sub> (I>2σ)                      | 0.0610                                            | 0.0670                                                         | 0.0447                                         | 0.0552                                         |
| wR <sub>2</sub>                            | 0.1456                                            | 0.1823                                                         | 0.0988                                         | 0.1372                                         |

## 6. Computation

All calculations were performed using Gaussian 16, Revision B.01<sup>9</sup> with M11L<sup>10</sup> functionals. The TZVP<sup>11</sup> basis set was used for all elements. Structures were optimized with PCM solvent correction (solvent = toluene). Frequency analysis was then performed to confirm that the structure is a ground state or a transition state as appropriate and to obtain the thermodynamic data.

### Optimized x,y,z-coordinates for O<sub>2</sub> reaction

#### 1a + O<sub>2</sub>

M11L/TZVP (solvent = toluene)

G = -1050.961241 Hartree

|   |              |              |              |
|---|--------------|--------------|--------------|
| N | -0.815354000 | -1.493231000 | -1.112512000 |
| N | 0.492410000  | -1.590993000 | -1.231438000 |
| C | 4.808964000  | 0.265205000  | -0.142004000 |
| C | 3.426707000  | 0.506349000  | -0.190350000 |
| N | -0.968643000 | -0.395375000 | -0.446718000 |
| C | 1.203571000  | -0.560574000 | -0.663877000 |
| C | -2.278948000 | 0.060508000  | -0.146774000 |
| C | -4.798102000 | 0.974225000  | 0.434500000  |
| C | 2.577882000  | -0.517015000 | -0.684122000 |
| C | 0.171870000  | 0.220506000  | -0.130408000 |
| C | -4.119538000 | 0.161447000  | 1.323675000  |
| C | -4.184934000 | 1.309847000  | -0.758629000 |
| C | -2.917183000 | 0.864256000  | -1.075377000 |
| C | 3.004078000  | 1.770949000  | 0.243295000  |
| C | 5.251773000  | 2.438060000  | 0.757831000  |
| C | -2.849555000 | -0.311844000 | 1.057688000  |
| C | 5.694973000  | 1.202902000  | 0.320049000  |
| C | -6.148082000 | 1.496440000  | 0.765006000  |
| C | 3.899617000  | 2.707015000  | 0.705119000  |
| C | 1.043047000  | -2.715594000 | -1.888701000 |
| C | -2.134861000 | -1.193388000 | 2.012218000  |
| C | -2.272294000 | 1.213546000  | -2.364990000 |
| H | -4.712336000 | 1.941467000  | -1.474796000 |
| H | 3.076246000  | -1.387343000 | -1.104117000 |
| H | 6.759005000  | 0.966991000  | 0.343747000  |
| H | 0.223173000  | -3.338951000 | -2.247109000 |
| H | 5.174395000  | -0.706515000 | -0.477927000 |
| H | -4.596252000 | -0.120672000 | 2.263486000  |
| H | 1.669746000  | -3.291410000 | -1.195325000 |
| H | 5.952960000  | 3.182972000  | 1.127940000  |
| H | -2.754045000 | -1.394857000 | 2.889746000  |
| H | -2.133269000 | 0.326898000  | -2.995318000 |
| H | -2.881497000 | 1.929438000  | -2.922127000 |
| H | 1.955408000  | 2.050499000  | 0.181211000  |
| H | -1.868996000 | -2.153047000 | 1.553332000  |
| H | -6.691667000 | 0.817698000  | 1.429266000  |
| H | -6.750842000 | 1.655659000  | -0.134408000 |

|   |              |              |              |
|---|--------------|--------------|--------------|
| H | 1.663499000  | -2.394148000 | -2.734551000 |
| H | 0.161744000  | 1.124073000  | 0.456055000  |
| H | -1.192882000 | -0.749113000 | 2.355492000  |
| H | -6.079646000 | 2.463110000  | 1.280092000  |
| H | -1.278493000 | 1.653714000  | -2.219677000 |
| H | 3.528572000  | 3.680128000  | 1.028073000  |
| O | 2.067737000  | -2.591621000 | 1.449178000  |
| O | 0.875062000  | -2.565434000 | 1.636660000  |

#### Int 1

M11L/TZVP (solvent = toluene)

G = -1050.964938 Hartree

|   |              |              |              |
|---|--------------|--------------|--------------|
| N | -4.632529000 | 1.759696000  | -2.771780000 |
| N | -3.828441000 | 2.322501000  | -3.647950000 |
| N | -4.584349000 | 3.261723000  | -4.169217000 |
| C | -2.818023000 | -2.418075000 | 0.555198000  |
| H | -2.174977000 | -2.052974000 | 1.362231000  |
| H | -2.271043000 | -3.184461000 | -0.002071000 |
| H | -3.674671000 | -2.912934000 | 1.030141000  |
| C | -3.266073000 | -1.312846000 | -0.328966000 |
| C | -3.525505000 | -0.057374000 | 0.189933000  |
| H | -3.367503000 | 0.127415000  | 1.253352000  |
| C | -3.973067000 | 0.981215000  | -0.601235000 |
| C | -4.151801000 | 0.713958000  | -1.949738000 |
| C | -5.840253000 | 2.325571000  | -2.719136000 |
| H | -6.625033000 | 2.058916000  | -2.027098000 |
| C | -5.808147000 | 3.324159000  | -3.646270000 |
| C | -6.911148000 | 4.261788000  | -4.001033000 |
| H | -6.519571000 | 5.300215000  | -3.890895000 |
| C | -7.393392000 | 4.059991000  | -5.410529000 |
| C | -7.743378000 | 2.797909000  | -5.857676000 |
| H | -7.649303000 | 1.946868000  | -5.181121000 |
| C | -8.224390000 | 2.620264000  | -7.136094000 |
| H | -8.504269000 | 1.625102000  | -7.478983000 |
| C | -8.352778000 | 3.703197000  | -7.982232000 |
| H | -8.730914000 | 3.562326000  | -8.993782000 |
| C | -3.456578000 | -1.523750000 | -1.681781000 |
| H | -3.255363000 | -2.509017000 | -2.104732000 |
| C | -3.904126000 | -0.522104000 | -2.520378000 |
| C | -4.225451000 | 2.330628000  | -0.037575000 |
| H | -3.706703000 | 3.110876000  | -0.607560000 |

|   |              |              |              |
|---|--------------|--------------|--------------|
| H | -3.880696000 | 2.383105000  | 0.998095000  |
| H | -5.289003000 | 2.602261000  | -0.049250000 |
| C | -7.531902000 | 5.139628000  | -6.260840000 |
| H | -7.268109000 | 6.135553000  | -5.901802000 |
| C | -8.006841000 | 4.963595000  | -7.543535000 |
| H | -8.113979000 | 5.820964000  | -8.206389000 |
| C | -4.035114000 | 4.094086000  | -5.190468000 |
| H | -2.968184000 | 3.881962000  | -5.262462000 |
| H | -4.188640000 | 5.144723000  | -4.928145000 |
| H | -4.525292000 | 3.888490000  | -6.147514000 |
| C | -4.109571000 | -0.765503000 | -3.969043000 |
| H | -5.048303000 | -0.327143000 | -4.328275000 |
| H | -4.132618000 | -1.837694000 | -4.180454000 |
| H | -3.306503000 | -0.322276000 | -4.569691000 |
| O | -7.914703000 | 4.029447000  | -3.111083000 |
| O | -7.305478000 | 4.281707000  | -1.843483000 |

### TS1

M11L/TZVP (solvent = toluene)

G = -1050.956399 Hartree

Imaginary Frequency -1362.0147

|   |              |              |              |
|---|--------------|--------------|--------------|
| N | -4.767714000 | 1.642491000  | -2.441104000 |
| N | -4.506147000 | 1.679018000  | -3.733407000 |
| N | -5.299041000 | 2.605452000  | -4.202220000 |
| C | -1.765136000 | -1.746768000 | 0.926719000  |
| H | -1.008011000 | -1.195518000 | 1.492864000  |
| H | -1.233535000 | -2.498662000 | 0.329669000  |
| H | -2.398572000 | -2.289375000 | 1.635022000  |
| C | -2.562255000 | -0.845302000 | 0.057203000  |
| C | -2.000287000 | 0.301447000  | -0.473500000 |
| H | -0.969834000 | 0.558912000  | -0.224014000 |
| C | -2.708074000 | 1.139880000  | -1.311143000 |
| C | -4.017994000 | 0.791483000  | -1.598591000 |
| C | -5.712189000 | 2.513672000  | -2.091697000 |
| H | -5.173090000 | 4.458194000  | -5.203113000 |
| C | -6.064417000 | 3.166397000  | -3.232132000 |
| C | -7.086800000 | 4.241823000  | -3.423874000 |
| H | -8.081052000 | 3.764387000  | -3.530354000 |
| C | -7.145881000 | 5.130900000  | -2.209915000 |
| C | -5.999670000 | 5.704077000  | -1.685997000 |
| H | -5.039558000 | 5.485646000  | -2.152264000 |
| C | -6.084119000 | 6.562340000  | -0.611967000 |
| H | -5.180269000 | 7.020118000  | -0.211980000 |
| C | -7.309182000 | 6.846092000  | -0.042926000 |
| H | -7.371207000 | 7.521389000  | 0.809367000  |
| C | -3.873391000 | -1.148459000 | -0.259492000 |
| H | -4.329251000 | -2.050617000 | 0.150899000  |
| C | -4.626566000 | -0.344100000 | -1.091318000 |
| C | -2.094216000 | 2.365327000  | -1.877257000 |
| H | -1.849803000 | 2.236722000  | -2.938209000 |
| H | -1.171368000 | 2.616729000  | -1.348310000 |
| H | -2.768941000 | 3.228043000  | -1.816890000 |
| C | -8.368694000 | 5.423003000  | -1.637498000 |
| H | -9.273058000 | 4.976766000  | -2.054914000 |
| C | -8.453295000 | 6.273873000  | -0.555790000 |
| H | -9.422228000 | 6.492780000  | -0.109367000 |

|   |              |              |              |
|---|--------------|--------------|--------------|
| C | -5.149823000 | 3.092148000  | -5.510501000 |
| H | -6.088377000 | 2.959985000  | -6.059660000 |
| H | -4.330428000 | 2.545816000  | -5.982183000 |
| C | -6.030722000 | -0.686823000 | -1.428490000 |
| H | -6.748077000 | -0.037798000 | -0.910408000 |
| H | -6.256029000 | -1.716346000 | -1.138597000 |
| H | -6.229338000 | -0.583167000 | -2.501300000 |
| O | -6.934916000 | 4.918860000  | -4.615145000 |
| O | -5.602202000 | 5.406175000  | -4.659305000 |
| H | -6.034408000 | 2.640871000  | -1.067810000 |

### Int 2

M11L/TZVP (solvent = toluene)

G = -1050.963013 Hartree

|   |               |              |              |
|---|---------------|--------------|--------------|
| N | -4.769319000  | 1.561353000  | -2.213413000 |
| N | -4.349389000  | 1.973753000  | -3.424915000 |
| N | -5.282184000  | 2.831495000  | -3.808639000 |
| C | -1.567346000  | -2.049263000 | 0.717149000  |
| H | -0.776700000  | -2.464945000 | 0.079473000  |
| H | -2.148946000  | -2.891381000 | 1.104150000  |
| H | -1.067403000  | -1.561842000 | 1.561075000  |
| C | -2.420132000  | -1.096149000 | -0.037813000 |
| C | -1.978745000  | 0.188572000  | -0.301448000 |
| H | -1.006564000  | 0.509209000  | 0.077264000  |
| C | -2.735730000  | 1.088652000  | -1.022073000 |
| C | -3.976763000  | 0.665554000  | -1.481710000 |
| C | -5.943885000  | 2.081705000  | -1.880056000 |
| H | -7.579210000  | 5.471360000  | -0.899638000 |
| C | -6.303679000  | 2.901530000  | -2.895100000 |
| C | -7.411104000  | 3.859086000  | -3.049825000 |
| H | -6.972190000  | 4.840986000  | -3.337790000 |
| C | -8.435109000  | 3.480200000  | -4.082672000 |
| C | -8.773377000  | 2.158525000  | -4.298626000 |
| H | -8.255861000  | 1.377223000  | -3.740403000 |
| C | -9.748535000  | 1.833972000  | -5.216417000 |
| H | -10.009795000 | 0.790374000  | -5.384831000 |
| C | -10.387423000 | 2.828599000  | -5.926063000 |
| H | -11.152789000 | 2.570543000  | -6.656551000 |
| C | -3.659649000  | -1.475244000 | -0.513596000 |
| H | -4.020412000  | -2.487298000 | -0.322389000 |
| C | -4.454474000  | -0.615111000 | -1.247754000 |
| C | -2.249708000  | 2.466273000  | -1.275360000 |
| H | -1.928852000  | 2.594628000  | -2.315162000 |
| H | -1.403153000  | 2.701866000  | -0.624354000 |
| H | -3.037098000  | 3.209823000  | -1.104344000 |
| C | -9.080001000  | 4.473246000  | -4.795841000 |
| H | -8.803359000  | 5.515301000  | -4.628133000 |
| C | -10.051672000 | 4.150321000  | -5.716163000 |
| H | -10.550312000 | 4.936904000  | -6.280303000 |
| C | -5.179061000  | 3.570641000  | -4.920077000 |
| H | -6.123616000  | 3.855969000  | -5.366633000 |
| H | -4.347819000  | 3.304133000  | -5.560319000 |
| C | -5.769956000  | -1.060623000 | -1.773231000 |
| H | -6.605832000  | -0.703912000 | -1.157497000 |
| H | -5.826974000  | -2.152721000 | -1.790508000 |
| H | -5.946194000  | -0.690547000 | -2.789872000 |
| O | -8.136240000  | 3.988074000  | -1.857132000 |



|   |              |             |              |
|---|--------------|-------------|--------------|
| O | -7.266031000 | 4.564404000 | -0.896849000 |
| H | -6.424710000 | 1.882544000 | -0.932989000 |

**TS2**

M11L/TZVP (solvent = toluene)

G = -1050.935981 Hartree

Imaginary Frequency -1969.6414

|   |               |              |              |
|---|---------------|--------------|--------------|
| N | -4.750541000  | 1.378354000  | -2.059563000 |
| N | -4.527779000  | 1.740875000  | -3.310233000 |
| N | -5.541365000  | 2.514572000  | -3.581351000 |
| C | -1.075390000  | -2.005456000 | 0.567870000  |
| H | -0.927245000  | -1.688449000 | 1.607115000  |
| H | -0.090013000  | -1.980597000 | 0.088886000  |
| H | -1.417979000  | -3.043927000 | 0.582238000  |
| C | -2.041722000  | -1.121535000 | -0.131803000 |
| C | -1.748516000  | 0.215771000  | -0.336821000 |
| H | -0.797922000  | 0.617608000  | 0.017260000  |
| C | -2.626637000  | 1.064294000  | -0.977294000 |
| C | -3.829203000  | 0.525979000  | -1.410041000 |
| C | -5.889287000  | 1.869631000  | -1.560649000 |
| H | -9.081054000  | 4.023043000  | -0.856105000 |
| C | -6.427089000  | 2.630967000  | -2.554087000 |
| C | -7.382691000  | 3.712600000  | -2.750158000 |
| H | -6.590900000  | 4.155949000  | -3.782581000 |
| C | -8.678218000  | 3.395498000  | -3.383309000 |
| C | -9.698747000  | 4.339202000  | -3.352981000 |
| H | -9.524621000  | 5.288198000  | -2.844389000 |
| C | -10.906457000 | 4.092516000  | -3.965729000 |
| H | -11.694975000 | 4.843408000  | -3.921633000 |
| C | -11.118309000 | 2.910192000  | -4.645499000 |
| H | -12.071548000 | 2.718977000  | -5.134877000 |
| C | -3.249994000  | -1.610935000 | -0.587295000 |
| H | -3.489505000  | -2.665335000 | -0.442847000 |
| C | -4.167148000  | -0.804185000 | -1.234280000 |
| C | -2.299540000  | 2.493970000  | -1.196913000 |
| H | -2.087897000  | 2.698550000  | -2.253069000 |
| H | -1.420253000  | 2.783093000  | -0.615767000 |
| H | -3.128856000  | 3.152068000  | -0.911813000 |
| C | -8.906002000  | 2.208875000  | -4.065102000 |
| H | -8.126871000  | 1.444477000  | -4.090141000 |
| C | -10.107614000 | 1.973129000  | -4.696019000 |
| H | -10.262354000 | 1.033248000  | -5.225228000 |
| C | -5.685907000  | 3.399105000  | -4.653776000 |
| H | -6.399858000  | 3.018254000  | -5.392888000 |
| H | -4.715495000  | 3.613472000  | -5.108427000 |
| C | -5.456580000  | -1.349438000 | -1.727246000 |
| H | -6.300976000  | -1.038776000 | -1.099334000 |
| H | -5.437066000  | -2.442377000 | -1.728894000 |
| H | -5.680129000  | -1.011074000 | -2.745650000 |
| O | -7.459089000  | 4.564085000  | -1.704230000 |
| O | -8.171505000  | 3.900920000  | -0.570281000 |
| H | -6.208321000  | 1.673164000  | -0.547650000 |

**Int3**

M11L/TZVP (solvent = toluene)

G = -975.114590 Hartree

|   |               |              |              |
|---|---------------|--------------|--------------|
| N | -4.390082000  | 1.779427000  | -3.235979000 |
| N | -4.296702000  | 2.441342000  | -2.116946000 |
| N | -5.200352000  | 3.360305000  | -2.204465000 |
| C | -1.042581000  | -2.637970000 | -4.279907000 |
| H | -0.886553000  | -3.256599000 | -3.391435000 |
| H | -0.066411000  | -2.333455000 | -4.667318000 |
| H | -1.505517000  | -3.279921000 | -5.039642000 |
| C | -1.904692000  | -1.467740000 | -3.986368000 |
| C | -2.908465000  | -1.553404000 | -3.038154000 |
| H | -3.047216000  | -2.483869000 | -2.486975000 |
| C | -3.745150000  | -0.492684000 | -2.759967000 |
| C | -3.533702000  | 0.669940000  | -3.482088000 |
| C | -5.348833000  | 2.257540000  | -4.031340000 |
| C | -5.899234000  | 3.307334000  | -3.356545000 |
| C | -6.891949000  | 4.355027000  | -3.741727000 |
| C | -7.926598000  | 3.991695000  | -4.708653000 |
| C | -8.535351000  | 5.023573000  | -5.411791000 |
| H | -8.201268000  | 6.045267000  | -5.238546000 |
| C | -9.529596000  | 4.742899000  | -6.314576000 |
| H | -9.997385000  | 5.548328000  | -6.876894000 |
| C | -9.938097000  | 3.436485000  | -6.507059000 |
| H | -10.731981000 | 3.216528000  | -7.219093000 |
| C | -1.735117000  | -0.276336000 | -4.668722000 |
| H | -0.936067000  | -0.188225000 | -5.405236000 |
| C | -2.542631000  | 0.817824000  | -4.437647000 |
| C | -4.808768000  | -0.601491000 | -1.731780000 |
| H | -4.530472000  | -0.080552000 | -0.807823000 |
| H | -4.989553000  | -1.648242000 | -1.476684000 |
| H | -5.760024000  | -0.172157000 | -2.068077000 |
| C | -8.344850000  | 2.682085000  | -4.901830000 |
| H | -7.917183000  | 1.871433000  | -4.312964000 |
| C | -9.354813000  | 2.409225000  | -5.794281000 |
| H | -9.696566000  | 1.385721000  | -5.932889000 |
| C | -5.347105000  | 4.270047000  | -1.101874000 |
| H | -4.738273000  | 3.883964000  | -0.284344000 |
| H | -6.397674000  | 4.320999000  | -0.809803000 |
| H | -5.013181000  | 5.264500000  | -1.402699000 |
| C | -2.336533000  | 2.095455000  | -5.164194000 |
| H | -3.125102000  | 2.285642000  | -5.903344000 |
| H | -1.388327000  | 2.077868000  | -5.706222000 |
| H | -2.316023000  | 2.956312000  | -4.485631000 |
| O | -6.766500000  | 5.444786000  | -3.266029000 |
| H | -5.556996000  | 1.833623000  | -5.004377000 |

**OH<sup>-</sup> M11L/TZVP (solvent = toluene)**

-75.863277 Hartree

|   |              |             |              |
|---|--------------|-------------|--------------|
| O | -0.788783000 | 1.554898000 | -2.500697000 |
| H | -1.599991000 | 1.045401000 | -2.501313000 |

**Int4**

M11L/TZVP (solvent = toluene)

G = -1051.090481 Hartree

|   |              |              |              |
|---|--------------|--------------|--------------|
| N | -5.344236000 | 2.595509000  | -5.203937000 |
| N | -4.494572000 | 3.466325000  | -4.741553000 |
| N | -4.916024000 | 4.595760000  | -5.232342000 |
| C | -4.803320000 | -2.858305000 | -3.856027000 |

|   |               |              |               |   |              |              |              |
|---|---------------|--------------|---------------|---|--------------|--------------|--------------|
| H | -4.875632000  | -3.506621000 | -4.734248000  | C | 0.014062000  | -2.022908000 | -0.733474000 |
| H | -5.556086000  | -3.176514000 | -3.128089000  | C | -0.426867000 | -1.773099000 | -2.022694000 |
| H | -3.821730000  | -3.040483000 | -3.400408000  | C | -2.185786000 | -0.067531000 | -2.426068000 |
| C | -4.962605000  | -1.427247000 | -4.216657000  | C | -2.176692000 | 1.277663000  | -2.702773000 |
| C | -5.407691000  | -0.510716000 | -3.281340000  | C | -3.533858000 | 2.754882000  | -2.450564000 |
| H | -5.672071000  | -0.851461000 | -2.279363000  | H | -4.504735000 | 2.046490000  | -1.052134000 |
| C | -5.534789000  | 0.831048000  | -3.578135000  | C | -3.743425000 | 3.098710000  | -3.899301000 |
| C | -5.201910000  | 1.226943000  | -4.862937000  | C | -4.470978000 | 2.290440000  | -4.754222000 |
| C | -6.287148000  | 3.154104000  | -5.975250000  | H | -4.915107000 | 1.372735000  | -4.370943000 |
| C | -6.008648000  | 4.489635000  | -6.004286000  | C | -4.631964000 | 2.645609000  | -6.074524000 |
| C | -6.529488000  | 5.680169000  | -6.851092000  | H | -5.210718000 | 2.007765000  | -6.742137000 |
| H | -6.795285000  | 7.435847000  | -6.235774000  | C | -4.064847000 | 3.809817000  | -6.555251000 |
| C | -7.763111000  | 5.154535000  | -7.604417000  | H | -4.192474000 | 4.088321000  | -7.600527000 |
| C | -7.650915000  | 4.890377000  | -8.953840000  | C | 0.013661000  | -3.996938000 | -2.682909000 |
| H | -6.695541000  | 5.107716000  | -9.431914000  | H | 0.024369000  | -4.770254000 | -3.452310000 |
| C | -8.727539000  | 4.397041000  | -9.662279000  | C | -0.440972000 | -2.736293000 | -3.016879000 |
| H | -8.634880000  | 4.199916000  | -10.730521000 | C | 0.027549000  | -0.956598000 | 0.297473000  |
| C | -9.924897000  | 4.155003000  | -9.021003000  | H | 0.833676000  | -0.235786000 | 0.115453000  |
| H | -10.777147000 | 3.768994000  | -9.579359000  | H | 0.178694000  | -1.381980000 | 1.292840000  |
| C | -4.646461000  | -0.978999000 | -5.485499000  | H | -0.907003000 | -0.383500000 | 0.309067000  |
| H | -4.294889000  | -1.690258000 | -6.234030000  | C | -3.186289000 | 4.266120000  | -4.380850000 |
| C | -4.758636000  | 0.351057000  | -5.839203000  | H | -2.639097000 | 4.901495000  | -3.684407000 |
| C | -6.009780000  | 1.803345000  | -2.563445000  | C | -3.343216000 | 4.620041000  | -5.704829000 |
| H | -5.189810000  | 2.430114000  | -2.193403000  | H | -2.903941000 | 5.545282000  | -6.076956000 |
| H | -6.444114000  | 1.283410000  | -1.705918000  | C | -0.248494000 | 2.787933000  | -2.995575000 |
| H | -6.768674000  | 2.483517000  | -2.967853000  | H | 0.790485000  | 2.757229000  | -2.664901000 |
| C | -8.965140000  | 4.909632000  | -6.965799000  | H | -0.817160000 | 3.547865000  | -2.452217000 |
| H | -9.057907000  | 5.138050000  | -5.903312000  | H | -0.290379000 | 3.007558000  | -4.067335000 |
| C | -10.043135000 | 4.414813000  | -7.670010000  | C | -0.910760000 | -2.425271000 | -4.389786000 |
| H | -10.991681000 | 4.235824000  | -7.163330000  | H | -1.998598000 | -2.289055000 | -4.429341000 |
| C | -4.192343000  | 5.796041000  | -4.946916000  | H | -0.656456000 | -3.236315000 | -5.076953000 |
| H | -3.196363000  | 5.517226000  | -4.600743000  | H | -0.465943000 | -1.500337000 | -4.774325000 |
| H | -4.721397000  | 6.367907000  | -4.180062000  | O | -3.005328000 | 3.540805000  | -1.679214000 |
| H | -4.167209000  | 6.373909000  | -5.876692000  | O | -4.567737000 | 1.981528000  | -2.004838000 |
| C | -4.412695000  | 0.814882000  | -7.205727000  | H | -3.000434000 | -0.763073000 | -2.277041000 |
| H | -5.305792000  | 1.048281000  | -7.798699000  |   |              |              |              |
| H | -3.858755000  | 0.041586000  | -7.743831000  |   |              |              |              |
| H | -3.800077000  | 1.723380000  | -7.190591000  |   |              |              |              |
| O | -5.597884000  | 6.148363000  | -7.580700000  |   |              |              |              |
| O | -6.987632000  | 6.589605000  | -5.832549000  |   |              |              |              |
| H | -7.076224000  | 2.577435000  | -6.435916000  |   |              |              |              |

### TS3

M11L/TZVP (solvent = toluene)

G = -1051.078473 Hartree

Imaginary Frequency -242.1396

|   |              |              |              |
|---|--------------|--------------|--------------|
| N | -0.907893000 | -0.477132000 | -2.331387000 |
| N | -0.064228000 | 0.494126000  | -2.519943000 |
| N | -0.854291000 | 1.519675000  | -2.735597000 |
| C | 0.908638000  | -5.672092000 | -1.068285000 |
| H | 0.089665000  | -6.256752000 | -0.630199000 |
| H | 1.719787000  | -5.660369000 | -0.333483000 |
| H | 1.253403000  | -6.215182000 | -1.953334000 |
| C | 0.458656000  | -4.298913000 | -1.409470000 |
| C | 0.454123000  | -3.300646000 | -0.452223000 |
| H | 0.807913000  | -3.521857000 | 0.555867000  |

### Int5

M11L/TZVP (solvent = toluene)

G = -1051.117477 Hartree

|   |               |              |              |
|---|---------------|--------------|--------------|
| N | -5.613948000  | 1.329117000  | -5.237049000 |
| N | -4.887374000  | 2.120357000  | -5.967825000 |
| N | -5.794205000  | 2.838595000  | -6.590001000 |
| C | -3.179573000  | -2.606501000 | -1.999792000 |
| H | -2.096542000  | -2.438116000 | -1.943064000 |
| H | -3.324635000  | -3.614108000 | -2.401896000 |
| H | -3.561314000  | -2.586652000 | -0.974441000 |
| C | -3.834162000  | -1.578681000 | -2.848368000 |
| C | -4.337175000  | -0.418106000 | -2.290807000 |
| H | -4.270247000  | -0.267994000 | -1.212241000 |
| C | -4.924210000  | 0.566307000  | -3.061423000 |
| C | -4.989307000  | 0.350209000  | -4.427334000 |
| C | -6.929404000  | 1.554960000  | -5.404734000 |
| C | -7.093322000  | 2.576745000  | -6.317688000 |
| C | -9.195519000  | 4.231274000  | -8.691661000 |
| H | -8.545522000  | 3.350086000  | -7.143247000 |
| C | -10.436728000 | 4.755669000  | -9.314162000 |

|   |               |              |               |
|---|---------------|--------------|---------------|
| C | -10.351573000 | 5.323009000  | -10.572926000 |
| H | -9.377554000  | 5.362732000  | -11.058668000 |
| C | -11.478457000 | 5.820414000  | -11.185603000 |
| H | -11.409178000 | 6.266206000  | -12.176707000 |
| C | -12.697754000 | 5.754425000  | -10.541855000 |
| H | -13.590711000 | 6.148479000  | -11.025739000 |
| C | -3.929668000  | -1.750609000 | -4.217140000  |
| H | -3.544594000  | -2.665186000 | -4.670661000  |
| C | -4.502922000  | -0.796377000 | -5.033670000  |
| C | -5.458913000  | 1.807485000  | -2.448056000  |
| H | -5.139778000  | 2.702443000  | -2.994202000  |
| H | -5.122120000  | 1.901634000  | -1.412389000  |
| H | -6.555910000  | 1.820186000  | -2.441000000  |
| C | -11.661037000 | 4.690089000  | -8.671796000  |
| H | -11.719661000 | 4.241368000  | -7.682318000  |
| C | -12.787798000 | 5.189813000  | -9.286034000  |
| H | -13.750936000 | 5.138580000  | -8.780276000  |
| C | -5.318679000  | 3.860159000  | -7.471227000  |
| H | -6.115719000  | 4.086990000  | -8.182705000  |
| H | -4.425230000  | 3.507226000  | -7.990764000  |
| H | -5.067135000  | 4.761665000  | -6.902749000  |
| C | -4.591427000  | -0.988040000 | -6.501854000  |
| H | -5.584355000  | -0.731771000 | -6.890036000  |
| H | -4.376969000  | -2.025590000 | -6.770677000  |
| H | -3.874693000  | -0.348970000 | -7.031282000  |
| O | -8.127749000  | 4.297953000  | -9.235591000  |
| O | -9.401073000  | 3.708602000  | -7.522159000  |
| H | -7.650757000  | 0.955340000  | -4.865012000  |

#### TS4

G = -1051.118142 Hartree

Imaginary Frequency -218.0105

|   |               |              |              |
|---|---------------|--------------|--------------|
| N | -5.559040000  | 1.460406000  | -5.395700000 |
| N | -4.726899000  | 2.188353000  | -6.080896000 |
| N | -5.531694000  | 2.986578000  | -6.743028000 |
| C | -3.692661000  | -2.649722000 | -2.003639000 |
| H | -3.267271000  | -2.257793000 | -1.074692000 |
| H | -2.940418000  | -3.279206000 | -2.488996000 |
| H | -4.526400000  | -3.305973000 | -1.723132000 |
| C | -4.153350000  | -1.557630000 | -2.897856000 |
| C | -4.581805000  | -0.351387000 | -2.375709000 |
| H | -4.549460000  | -0.191979000 | -1.296942000 |
| C | -5.048540000  | 0.667576000  | -3.182114000 |
| C | -5.063809000  | 0.439513000  | -4.547485000 |
| C | -6.838867000  | 1.797568000  | -5.626418000 |
| C | -6.854689000  | 2.829880000  | -6.535371000 |
| C | -10.063946000 | 3.280125000  | -6.761032000 |
| H | -8.157614000  | 3.494101000  | -7.041061000 |
| C | -11.416409000 | 3.795823000  | -7.119240000 |
| C | -12.528144000 | 3.176304000  | -6.577855000 |
| H | -12.372400000 | 2.331693000  | -5.907646000 |
| C | -13.792156000 | 3.625161000  | -6.885889000 |
| H | -14.665601000 | 3.134222000  | -6.458562000 |
| C | -13.952744000 | 4.699701000  | -7.737576000 |

|   |               |              |              |
|---|---------------|--------------|--------------|
| H | -14.952833000 | 5.056347000  | -7.981800000 |
| C | -4.186590000  | -1.734837000 | -4.268657000 |
| H | -3.846906000  | -2.679330000 | -4.696128000 |
| C | -4.640218000  | -0.747635000 | -5.120509000 |
| C | -5.502969000  | 1.958531000  | -2.608643000 |
| H | -5.048874000  | 2.814615000  | -3.121139000 |
| H | -5.245354000  | 2.021200000  | -1.548284000 |
| H | -6.589401000  | 2.083236000  | -2.693173000 |
| C | -11.582139000 | 4.872015000  | -7.973154000 |
| H | -10.700674000 | 5.352256000  | -8.393838000 |
| C | -12.847315000 | 5.322703000  | -8.279679000 |
| H | -12.976156000 | 6.170695000  | -8.951167000 |
| C | -4.924899000  | 3.943787000  | -7.613478000 |
| H | -3.842235000  | 3.816562000  | -7.574173000 |
| H | -5.191897000  | 4.954575000  | -7.294970000 |
| H | -5.281016000  | 3.790618000  | -8.635207000 |
| C | -4.664114000  | -0.946747000 | -6.590213000 |
| H | -5.619329000  | -0.635812000 | -7.029740000 |
| H | -4.500806000  | -1.998005000 | -6.840850000 |
| H | -3.883366000  | -0.358182000 | -7.086809000 |
| O | -9.929293000  | 2.359290000  | -5.995365000 |
| O | -9.104406000  | 3.909305000  | -7.342160000 |
| H | -7.656667000  | 1.282842000  | -5.139503000 |

#### 2

M11L/TZVP (solvent = toluene)

G = -1051.123235 Hartree

|   |              |             |              |
|---|--------------|-------------|--------------|
| N | 1.331686000  | 7.189524000 | 12.776067000 |
| N | 1.075086000  | 8.161455000 | 13.613397000 |
| N | 0.048442000  | 7.723144000 | 14.276864000 |
| C | 2.140548000  | 7.269794000 | 10.513304000 |
| C | 3.214269000  | 7.395721000 | 9.654759000  |
| C | 2.414747000  | 7.319967000 | 11.871831000 |
| C | 3.692515000  | 7.468316000 | 12.386437000 |
| C | 4.725620000  | 7.585657000 | 11.478530000 |
| C | 4.508502000  | 7.551521000 | 10.114285000 |
| C | 0.491489000  | 6.151626000 | 12.883845000 |
| H | 0.477196000  | 5.241634000 | 12.239433000 |
| C | 5.643160000  | 7.647655000 | 9.162291000  |
| H | 5.363552000  | 8.194168000 | 8.256070000  |
| H | 5.972009000  | 6.650514000 | 8.843491000  |
| H | 6.507272000  | 8.144649000 | 9.613072000  |
| C | -0.359168000 | 6.514686000 | 13.879620000 |
| H | -1.206196000 | 5.981404000 | 14.287036000 |
| C | 0.764687000  | 7.092790000 | 9.986985000  |
| H | 0.037361000  | 7.725236000 | 10.509196000 |
| H | 0.418278000  | 6.055157000 | 10.091879000 |
| H | 0.731203000  | 7.348278000 | 8.924824000  |
| C | 3.964100000  | 7.483922000 | 13.845484000 |
| H | 3.390856000  | 6.716266000 | 14.378279000 |
| H | 3.704451000  | 8.447065000 | 14.299251000 |
| H | 5.025218000  | 7.302127000 | 14.034888000 |
| C | -0.492734000 | 8.532464000 | 15.324081000 |
| H | -0.121699000 | 9.549568000 | 15.198344000 |

|   |              |              |              |   |              |              |              |
|---|--------------|--------------|--------------|---|--------------|--------------|--------------|
| H | -0.180991000 | 8.142833000  | 16.297126000 | H | -0.563289000 | 0.239683000  | -1.936992000 |
| H | -1.582240000 | 8.521443000  | 15.259456000 | C | 1.039739000  | 0.566826000  | -0.390219000 |
| H | 5.742190000  | 7.698252000  | 11.857579000 | C | 2.255858000  | 0.452204000  | -1.054366000 |
| H | 3.025341000  | 7.370270000  | 8.580888000  | H | 2.250224000  | 0.832707000  | -2.073408000 |
| C | -1.840526000 | 2.344505000  | 11.365211000 | C | 3.541360000  | 0.216745000  | -0.450287000 |
| C | -3.234531000 | 0.154687000  | 10.389770000 | C | 3.711550000  | -0.776383000 | 0.513283000  |
| C | -2.097499000 | 0.595865000  | 9.743084000  | H | 2.854793000  | -1.397327000 | 0.776691000  |
| C | -1.405763000 | 1.684336000  | 10.229901000 | C | 4.945979000  | -1.014273000 | 1.070445000  |
| C | -2.980618000 | 1.894486000  | 12.006607000 | H | 5.054331000  | -1.799935000 | 1.818343000  |
| C | -1.085423000 | 3.539808000  | 11.905365000 | C | 6.048579000  | -0.288065000 | 0.666335000  |
| C | -3.675187000 | 0.806675000  | 11.524043000 | H | 7.024822000  | -0.482993000 | 1.106694000  |
| O | -0.067281000 | 3.875535000  | 11.276342000 | C | -4.285829000 | -1.274473000 | 0.378731000  |
| O | -1.536058000 | 4.076654000  | 12.917775000 | H | -4.673398000 | -2.265796000 | 0.616684000  |
| H | -3.782233000 | -0.706176000 | 10.006874000 | C | -2.920539000 | -1.073822000 | 0.401601000  |
| H | -4.572133000 | 0.458308000  | 12.036459000 | C | -2.776561000 | 2.597692000  | -0.554055000 |
| H | -0.505124000 | 2.050057000  | 9.738065000  | H | -2.065236000 | 2.950359000  | 0.201614000  |
| H | -1.748275000 | 0.080530000  | 8.848141000  | H | -3.590335000 | 3.323924000  | -0.619915000 |
| H | -3.307233000 | 2.426157000  | 12.899905000 | H | -2.247825000 | 2.608016000  | -1.514916000 |

**MECP for the formation of Int1**

M11L/TZVP (solvent = toluene)

G = -1050.926712 Hartree

|   |              |              |              |   |              |              |              |
|---|--------------|--------------|--------------|---|--------------|--------------|--------------|
| N | -1.068074000 | 0.426648000  | 0.112292000  | C | 5.904905000  | 0.665736000  | -0.321257000 |
| N | -0.476051000 | 0.602437000  | 1.257252000  | H | 6.771305000  | 1.230158000  | -0.664318000 |
| N | 0.790680000  | 0.691351000  | 0.945975000  | C | 1.697439000  | 1.039120000  | 1.988561000  |
| C | -6.631689000 | -0.511396000 | 0.040179000  | H | 1.136723000  | 1.570980000  | 2.758831000  |
| H | -7.198173000 | 0.416859000  | -0.073371000 | H | 2.477826000  | 1.682322000  | 1.576547000  |
| H | -6.965608000 | -1.005867000 | 0.958692000  | H | 2.171140000  | 0.152555000  | 2.420597000  |
| H | -6.904645000 | -1.172566000 | -0.791164000 | C | -1.975212000 | -2.161686000 | 0.749073000  |
| C | -5.169736000 | -0.257133000 | 0.064493000  | H | -1.133707000 | -2.219131000 | 0.044133000  |
| C | -4.663783000 | 0.993523000  | -0.234261000 | H | -2.486406000 | -3.127156000 | 0.758879000  |
| H | -5.350691000 | 1.804125000  | -0.479012000 | H | -1.543615000 | -2.003256000 | 1.745609000  |
| C | -3.306121000 | 1.250364000  | -0.229937000 | O | 1.828605000  | -1.530355000 | -1.630022000 |
| C | -2.468573000 | 0.199978000  | 0.092686000  | O | 0.591696000  | -1.790293000 | -1.714850000 |
| C | -0.230212000 | 0.385749000  | -0.922387000 |   |              |              |              |

## 7. References

- (1) Kohler, E. P.; Chadwell, H. M. *Org. Synth.* **1922**, *2*, 1.
- (2) Brown, D. G.; Sanguantrakun, N.; Schulze, B.; Schubert, U. S.; Berlinguette, C. P. *J. Am. Chem. Soc.* **2012**, *134*, 12354.
- (3) Bielawski, M.; Zhu, M.; Olofsson, B. *Adv. Synth. Catal.* **2007**, *349*, 2610.
- (4) Liang, Q.; Hayashi, K.; Song, D. *Organometallics* **2020**, *39*, 4115.
- (5) CC
- (6) *Apex2 Software Package*; Bruker AXS Inc.: Madison, WI, 2013.
- (7) Sheldrick, G. M. Crystal structure refinement with SHELXL. *Acta Crystallogr., Sect. C: Struct. Chem.* **2015**, *C71*, 3.
- (8) <http://shelx.uni-ac.gwdg.de/SHELX/index.php>. (accessed on January 30, 2017).
- (9) Frisch, M. J.; Trucks, G. W.; Schlegel, H. B.; Scuseria, G. E.; Robb, M. A.; Cheeseman, J. R.; Scalmani, G.; Barone, V.; Petersson, G. A.; Nakatsuji, H.; Li, X.; Caricato, M.; Marenich, A. V.; Bloino, J.; Janesko, B. G.; Gomperts, R.; Mennucci, B.; Hratchian, H. P.; Ortiz, J. V.; Izmaylov, A. F.; Sonnenberg, J. L.; Williams-Young, D.; Ding, F.; Lipparini, F.; Egidi, F.; Goings, J.; Peng, B.; Petrone, A.; Henderson, T.; Ranasinghe, D.; Zakrzewski, V. G.; Gao, J.; Rega, N.; Zheng, G.; Liang, W.; Hada, M.; Ehara, M.; Toyota, K.; Fukuda, R.; Hasegawa, J.; Ishida, M.; Nakajima, T.; Honda, Y.; Kitao, O.; Nakai, H.; Vreven, T.; Throssell, K.; Montgomery, J. A., Jr.; Peralta, J. E.; Ogliaro, F.; Bearpark, M. J.; Heyd, J. J.; Brothers, E. N.; Kudin, K. N.; Staroverov, V. N.; Keith, T. A.; Kobayashi, R.; Normand, J.; Raghavachari, K.; Rendell, A. P.; Burant, J. C.; Iyengar, S. S.; Tomasi, J.; Cossi, M.; Millam, J. M.; Klene, M.; Adamo, C.; Cammi, R.; Ochterski, J. W.; Martin, R. L.; Morokuma, K.; Farkas, O.; Foresman, J. B.; Fox, D. J. Gaussian, Inc., Wallingford CT, 2016.
- (10) Peverati, R.; Truhlar, D. G. *J. Phys. Chem. Lett.* **2012**, *3*, 117.

- (11) Schäfer, A.; Huber, C.; Ahlrichs, R. *J. Chem. Phys.* **1994**, *100*, 5829.
